# Supplementary material for: Mitigation of block withholding attack based on zero-determinant strategy
Source: PeerJ Comput Sci. 2022 Jul 21;8:e997. doi: 10.7717/peerj-cs.997 (PMC9455053; doi:10.7717/peerj-cs.997)
Supplement: Supplemental Information 1 [file peerj-cs-08-997-s001.xlsx]

## Sheet: Sheet1
Random of X	Random of Y	Set-AllC of X	Set-AllD of X	Set-TFT of X	Set-WSLS of X	Set-Random of X	Extortionate-AllC of X	Extortionate-AllD of X	Extortionate-TFT of X	Extortionate-WSLS of X	Extortionate-Random of X	Adaptive-AllC of X	Adaptive-AllD of X	Adaptive-TFT of X	Adaptive-WSLS of X	Adaptive-Random of X
0.512909	0.218959	0.0258179	0.538727	0.0516357	0.564545	0.0774536	0.590363	0.103271	0.61618	0.129089	0.641998	0.206543	0.796906	0.309814	0.951813	0.129089
0.460484	0.0470446	0.920968	0.381451	0.841935	0.302419	0.762903	0.223386	0.68387	0.144354	0.604838	0.0653213	0.36774	0.591126	0.05161	0.116931	0.604838
0.350395	0.678865	0.700791	0.0511861	0.401581	0.751977	0.102372	0.452768	0.803163	0.153558	0.503954	0.854349	0.606326	0.0590936	0.409489	0.263838	0.503954
0.0950457	0.679296	0.190091	0.285137	0.380183	0.475229	0.570274	0.66532	0.760366	0.855412	0.950457	0.0455031	0.520732	0.186052	0.281098	0.326601	0.950457
0.433671	0.934693	0.867342	0.301013	0.734684	0.168355	0.602026	0.0356973	0.469368	0.903039	0.33671	0.770381	0.938737	0.974434	0.408105	0.178487	0.33671
0.709235	0.383502	0.41847	0.127706	0.836941	0.546176	0.255411	0.964646	0.673882	0.383117	0.092352	0.801587	0.347763	0.31241	0.0216447	0.823232	0.092352
0.115968	0.519416	0.231936	0.347905	0.463873	0.579841	0.695809	0.811778	0.927746	0.0437141	0.159682	0.275651	0.855492	0.667269	0.783238	0.0588881	0.159682
0.0780847	0.830965	0.156169	0.234254	0.312339	0.390423	0.468508	0.546593	0.624677	0.702762	0.780847	0.858932	0.249355	0.795948	0.874032	0.732964	0.780847
0.369253	0.0345721	0.738506	0.107759	0.477012	0.846265	0.215517	0.58477	0.954023	0.323276	0.692529	0.061782	0.908047	0.492817	0.86207	0.923852	0.692529
0.0336284	0.0534616	0.0672568	0.100885	0.134514	0.168142	0.20177	0.235399	0.269027	0.302655	0.336284	0.369912	0.538054	0.773453	0.807081	0.176993	0.336284
0.19215	0.5297	0.384301	0.576451	0.768602	0.960752	0.152902	0.345053	0.537203	0.729353	0.921504	0.113654	0.074406	0.419459	0.611609	0.725263	0.921504
0.47136	0.671149	0.94272	0.41408	0.885439	0.356799	0.828159	0.299519	0.770879	0.242239	0.713598	0.184958	0.541758	0.841276	0.312636	0.497595	0.713598
0.144923	0.00769819	0.289846	0.434768	0.579691	0.724614	0.869537	0.0144597	0.159383	0.304305	0.449228	0.594151	0.318765	0.333225	0.478148	0.0722987	0.449228
0.717836	0.383416	0.435671	0.153507	0.871342	0.589178	0.307013	0.0248487	0.742684	0.46052	0.178355	0.896191	0.485368	0.510217	0.228053	0.124243	0.178355
0.661714	0.0668422	0.323429	0.985143	0.646857	0.308571	0.970286	0.632	0.293714	0.955429	0.617143	0.278857	0.587428	0.219428	0.881143	0.16	0.617143
0.43187	0.417486	0.863741	0.295611	0.727482	0.159352	0.591222	0.0230929	0.454963	0.886834	0.318704	0.750575	0.909927	0.93302	0.36489	0.115464	0.318704
0.446035	0.686773	0.89207	0.338105	0.78414	0.230174	0.676209	0.122244	0.568279	0.014314	0.460349	0.906384	0.136558	0.258802	0.704837	0.611221	0.460349
0.508332	0.588977	0.0166631	0.524995	0.0333261	0.541658	0.0499892	0.558321	0.0666523	0.574984	0.0833153	0.591647	0.133305	0.691625	0.199957	0.791604	0.0833153
0.528088	0.930436	0.0561757	0.584264	0.112351	0.640439	0.168527	0.696615	0.224703	0.752791	0.280879	0.808967	0.449406	0.146021	0.674109	0.483076	0.280879
0.572878	0.846167	0.145756	0.718634	0.291512	0.86439	0.437268	0.0101461	0.583024	0.155902	0.72878	0.301658	0.166048	0.176194	0.749072	0.0507306	0.72878
0.360822	0.526929	0.721644	0.0824662	0.443288	0.80411	0.164932	0.525754	0.886577	0.247399	0.608221	0.969043	0.773153	0.298908	0.65973	0.628772	0.608221
0.336477	0.0919649	0.672955	0.00943177	0.345909	0.682386	0.0188635	0.355341	0.691818	0.0282953	0.364773	0.70125	0.383636	0.738977	0.0754542	0.776704	0.364773
0.173266	0.653919	0.346533	0.519799	0.693065	0.866331	0.0395976	0.212864	0.38613	0.559396	0.732663	0.905929	0.77226	0.985124	0.15839	0.0643193	0.732663
0.0861185	0.415999	0.172237	0.258355	0.344474	0.430592	0.516711	0.602829	0.688948	0.775066	0.861185	0.947303	0.377896	0.980725	0.0668436	0.0141469	0.861185
0.393336	0.701191	0.786673	0.180009	0.573345	0.966682	0.360018	0.753355	0.146691	0.540027	0.933364	0.3267	0.293382	0.0467365	0.440073	0.766773	0.933364
0.804368	0.910321	0.608736	0.413104	0.217472	0.0218394	0.826207	0.630575	0.434943	0.239311	0.0436789	0.848047	0.869886	0.500461	0.304829	0.152876	0.0436789
0.0110807	0.762198	0.0221614	0.0332421	0.0443227	0.0554034	0.0664841	0.0775648	0.0886455	0.0997262	0.110807	0.121888	0.177291	0.254856	0.265936	0.387824	0.110807
0.233113	0.262453	0.466226	0.69934	0.932453	0.165566	0.398679	0.631793	0.864906	0.098019	0.331132	0.564245	0.729811	0.361604	0.594717	0.158963	0.331132
0.933851	0.0474645	0.867701	0.801552	0.735402	0.669253	0.603104	0.536954	0.470805	0.404655	0.338506	0.272356	0.941609	0.478563	0.412414	0.684771	0.338506
0.226798	0.736082	0.453595	0.680393	0.90719	0.133988	0.360785	0.587583	0.81438	0.0411777	0.267975	0.494773	0.62876	0.216343	0.443141	0.937913	0.267975
0.785947	0.328234	0.571894	0.357841	0.143788	0.929735	0.715682	0.501629	0.287576	0.0735227	0.85947	0.645417	0.575152	0.0767803	0.862727	0.508144	0.85947
0.410729	0.632639	0.821458	0.232186	0.642915	0.0536441	0.464373	0.875102	0.285831	0.696559	0.107288	0.518017	0.571661	0.446763	0.857492	0.375509	0.107288
0.119393	0.75641	0.238786	0.358178	0.477571	0.596964	0.716357	0.835749	0.955142	0.074535	0.193928	0.313321	0.910284	0.746034	0.865427	0.178747	0.193928
0.63437	0.991037	0.268741	0.903111	0.537481	0.171852	0.806222	0.440592	0.0749628	0.709333	0.343703	0.978074	0.149926	0.590518	0.224888	0.202962	0.343703
0.862388	0.365339	0.724776	0.587165	0.449553	0.311941	0.174329	0.0367173	0.899105	0.761494	0.623882	0.48627	0.798211	0.834928	0.697316	0.183587	0.623882
0.158244	0.247039	0.316487	0.474731	0.632975	0.791218	0.949462	0.107706	0.265949	0.424193	0.582437	0.74068	0.531899	0.639604	0.797848	0.538528	0.582437
0.601185	0.98255	0.20237	0.803555	0.40474	0.00592539	0.60711	0.208296	0.809481	0.410666	0.0118508	0.613036	0.618961	0.827257	0.428442	0.0414777	0.0118508
0.117607	0.72266	0.235215	0.352822	0.470429	0.588037	0.705644	0.823251	0.940858	0.0584658	0.176073	0.29368	0.881717	0.704968	0.822575	0.116256	0.176073
0.626098	0.753356	0.252197	0.878295	0.504393	0.130492	0.75659	0.382689	0.00878687	0.634885	0.260984	0.887082	0.0175737	0.400262	0.0263606	0.913443	0.260984
0.835125	0.651519	0.670249	0.505374	0.340499	0.175623	0.010748	0.845873	0.680997	0.516122	0.351247	0.186371	0.361995	0.207868	0.0429922	0.229364	0.351247
0.940407	0.0726859	0.880813	0.82122	0.761627	0.702034	0.64244	0.582847	0.523254	0.46366	0.404067	0.344474	0.0465073	0.629354	0.569761	0.914235	0.404067
0.415557	0.631635	0.831115	0.246672	0.662229	0.0777866	0.493344	0.908901	0.324459	0.740016	0.155573	0.571131	0.648917	0.557819	0.973376	0.544507	0.155573
0.272025	0.884707	0.54405	0.816076	0.0881009	0.360126	0.632151	0.904177	0.176202	0.448227	0.720252	0.992278	0.352404	0.25658	0.528605	0.520883	0.720252
0.928002	0.27271	0.856003	0.784005	0.712006	0.640008	0.568009	0.496011	0.424012	0.352014	0.280015	0.208017	0.848024	0.344035	0.272036	0.480053	0.280015
0.921315	0.436411	0.84263	0.763945	0.68526	0.606575	0.52789	0.449205	0.37052	0.291835	0.21315	0.134466	0.741041	0.190246	0.111561	0.246027	0.21315
0.542025	0.766495	0.0840498	0.626075	0.1681	0.710125	0.25215	0.794174	0.336199	0.878224	0.420249	0.962274	0.672399	0.466573	0.00859816	0.970872	0.420249
0.812885	0.477732	0.625771	0.438656	0.251542	0.0644274	0.877313	0.690198	0.503084	0.315969	0.128855	0.94174	0.00616779	0.696366	0.509252	0.450992	0.128855
0.166378	0.237774	0.332757	0.499135	0.665513	0.831892	0.99827	0.164648	0.331027	0.497405	0.663783	0.830161	0.662053	0.826701	0.99308	0.823241	0.663783
0.320382	0.274907	0.640764	0.961146	0.281527	0.601909	0.922291	0.242673	0.563055	0.883437	0.203819	0.5242	0.12611	0.368783	0.689165	0.213365	0.203819
0.657881	0.359265	0.315761	0.973642	0.631523	0.289404	0.947284	0.605165	0.263046	0.920927	0.578807	0.236688	0.526092	0.131257	0.789138	0.0258262	0.578807
0.00176289	0.166507	0.00352579	0.00528868	0.00705157	0.00881447	0.0105774	0.0123403	0.0141031	0.015866	0.0176289	0.0193918	0.0282063	0.0405466	0.0423094	0.0617013	0.0176289
0.628951	0.486517	0.257903	0.886854	0.515805	0.144757	0.773708	0.402659	0.0316108	0.660562	0.289513	0.918465	0.0632215	0.465881	0.0948323	0.0132971	0.289513
0.785286	0.897656	0.570571	0.355857	0.141142	0.926428	0.711713	0.496999	0.282285	0.0675702	0.852856	0.638141	0.564569	0.0615683	0.846854	0.484995	0.852856
0.294686	0.909208	0.589372	0.884058	0.178744	0.473431	0.768117	0.0628029	0.357489	0.652175	0.946861	0.241547	0.714978	0.777781	0.072467	0.314014	0.946861
0.789684	0.0605643	0.579368	0.369051	0.158735	0.948419	0.738103	0.527787	0.317471	0.107154	0.896838	0.686522	0.634941	0.162728	0.952412	0.638934	0.896838
0.215886	0.904653	0.431773	0.647659	0.863546	0.0794321	0.295319	0.511205	0.727091	0.942978	0.158864	0.374751	0.454183	0.965388	0.181274	0.556025	0.158864
0.403213	0.504523	0.806426	0.209639	0.612852	0.0160654	0.419279	0.822492	0.225705	0.628918	0.0321309	0.435344	0.451409	0.273901	0.677114	0.112458	0.0321309
0.802396	0.516292	0.604791	0.407187	0.209582	0.0119778	0.814373	0.616769	0.419164	0.22156	0.0239556	0.826351	0.838329	0.455098	0.257493	0.0838445	0.0239556
0.862149	0.319033	0.724299	0.586448	0.448597	0.310747	0.172896	0.0350453	0.897195	0.759344	0.621493	0.483643	0.794389	0.829435	0.691584	0.175227	0.621493
0.14377	0.986642	0.28754	0.43131	0.575081	0.718851	0.862621	0.00639111	0.150161	0.293931	0.437702	0.581472	0.300323	0.306714	0.450484	0.0319556	0.437702
0.345059	0.493977	0.690119	0.035178	0.380237	0.725297	0.0703561	0.415415	0.760475	0.105534	0.450593	0.795653	0.52095	0.936365	0.281424	0.0770771	0.450593
0.41243	0.266145	0.82486	0.23729	0.64972	0.0621497	0.47458	0.88701	0.29944	0.71187	0.124299	0.536729	0.598879	0.485889	0.898319	0.435048	0.124299
0.710129	0.0907329	0.420259	0.130388	0.840517	0.550646	0.260776	0.970905	0.681034	0.391164	0.101293	0.811422	0.362069	0.332973	0.0431028	0.854525	0.101293
0.142832	0.947764	0.285664	0.428496	0.571328	0.71416	0.856992	0.999824	0.142656	0.285488	0.42832	0.571152	0.285312	0.285136	0.427968	0.99912	0.42832
0.577453	0.0737491	0.154906	0.73236	0.309813	0.887266	0.464719	0.0421724	0.619626	0.197079	0.774532	0.351985	0.239251	0.281424	0.858877	0.210862	0.774532
0.256027	0.500707	0.512054	0.768081	0.0241082	0.280135	0.536162	0.792189	0.0482163	0.304243	0.56027	0.816297	0.0964326	0.888622	0.144649	0.960946	0.56027
0.0464254	0.384142	0.0928507	0.139276	0.185701	0.232127	0.278552	0.324978	0.371403	0.417828	0.464254	0.510679	0.742806	0.0677832	0.114209	0.624888	0.464254
0.270999	0.277082	0.541998	0.812997	0.0839955	0.354994	0.625993	0.896992	0.167991	0.43899	0.709989	0.980987	0.335982	0.232974	0.503973	0.48496	0.709989
0.677885	0.913817	0.355771	0.0336561	0.711541	0.389427	0.0673122	0.745198	0.423083	0.100968	0.778854	0.456739	0.846166	0.591363	0.269249	0.725988	0.778854
0.219393	0.529747	0.438786	0.658179	0.877572	0.0969656	0.316359	0.535752	0.755145	0.974538	0.193931	0.413324	0.51029	0.0460418	0.265435	0.678759	0.193931
0.340164	0.464446	0.680328	0.0204926	0.360657	0.700821	0.0409852	0.381149	0.721314	0.0614779	0.401642	0.741806	0.442627	0.823777	0.163941	0.905747	0.401642
0.139813	0.94098	0.279625	0.419438	0.559251	0.699064	0.838876	0.978689	0.118502	0.258315	0.398127	0.53794	0.237004	0.215693	0.355506	0.893446	0.398127
0.832864	0.050084	0.665727	0.498591	0.331455	0.164318	0.997182	0.830046	0.662909	0.495773	0.328637	0.1615	0.325819	0.155865	0.988728	0.150229	0.328637
0.939878	0.761514	0.879755	0.819633	0.759511	0.699389	0.639266	0.579144	0.519022	0.4589	0.398777	0.338655	0.0380439	0.617188	0.557066	0.895721	0.398777
0.525193	0.770205	0.0503863	0.57558	0.100773	0.625966	0.151159	0.676352	0.201545	0.726739	0.251932	0.777125	0.403091	0.0794429	0.604636	0.381761	0.251932
0.921584	0.827817	0.843168	0.764752	0.686336	0.60792	0.529504	0.451088	0.372672	0.294256	0.21584	0.137424	0.745344	0.196432	0.118016	0.25544	0.21584
0.0622541	0.125365	0.124508	0.186762	0.249016	0.31127	0.373524	0.435778	0.498032	0.560287	0.622541	0.684795	0.996065	0.431843	0.494097	0.178892	0.622541
0.303957	0.0158677	0.607913	0.91187	0.215826	0.519783	0.82374	0.127696	0.431653	0.735609	0.0395661	0.343523	0.863306	0.991002	0.294959	0.638481	0.0395661
0.598687	0.688455	0.197373	0.79606	0.394746	0.993433	0.592119	0.190806	0.789493	0.388179	0.986866	0.585552	0.578985	0.769791	0.368478	0.95403	0.986866
0.125176	0.868247	0.250352	0.375528	0.500704	0.62588	0.751057	0.876233	0.00140874	0.126585	0.251761	0.376937	0.00281748	0.87905	0.00422622	0.381163	0.251761
0.834589	0.629543	0.669179	0.503768	0.338358	0.172947	0.00753683	0.842126	0.676716	0.511305	0.345895	0.180484	0.353432	0.195558	0.0301473	0.210632	0.345895
0.945255	0.736225	0.890511	0.835766	0.781021	0.726276	0.671532	0.616787	0.562042	0.507298	0.452553	0.397808	0.124085	0.740872	0.686127	0.0839352	0.452553
0.905671	0.725412	0.811341	0.717012	0.622683	0.528353	0.434024	0.339695	0.245365	0.151036	0.0567065	0.962377	0.49073	0.830425	0.736096	0.698473	0.0567065
0.606619	0.999458	0.213238	0.819857	0.426476	0.0330946	0.639713	0.246332	0.852951	0.45957	0.0661891	0.672808	0.705903	0.952235	0.558854	0.231662	0.0661891
0.444027	0.888572	0.888053	0.33208	0.776107	0.220134	0.66416	0.108187	0.552214	0.996241	0.440267	0.884294	0.104428	0.212615	0.656642	0.540936	0.440267
0.757435	0.233195	0.51487	0.272305	0.0297399	0.787175	0.54461	0.302045	0.0594799	0.816915	0.57435	0.331785	0.11896	0.421005	0.17844	0.510224	0.57435
0.20977	0.306322	0.41954	0.629309	0.839079	0.0488489	0.258619	0.468388	0.678158	0.887928	0.0976978	0.307468	0.356317	0.824705	0.0344748	0.341942	0.0976978
0.60073	0.351015	0.20146	0.80219	0.402921	0.00365073	0.604381	0.205111	0.805841	0.406571	0.00730146	0.608032	0.611682	0.816793	0.417523	0.0255551	0.00730146
0.471558	0.513274	0.943115	0.414673	0.88623	0.357788	0.829346	0.300903	0.772461	0.244018	0.715576	0.187134	0.544922	0.845825	0.317382	0.504516	0.715576
0.468594	0.591114	0.937188	0.405782	0.874376	0.34297	0.811564	0.280158	0.748752	0.217346	0.68594	0.154534	0.497504	0.777662	0.246256	0.40079	0.68594
0.659553	0.845982	0.319106	0.978659	0.638212	0.297765	0.957318	0.616871	0.276424	0.935977	0.59553	0.255083	0.552848	0.169719	0.829272	0.0843555	0.59553
0.107523	0.412081	0.215046	0.322568	0.430091	0.537614	0.645137	0.752659	0.860182	0.967705	0.0752278	0.182751	0.720364	0.473024	0.580547	0.763297	0.0752278
0.135295	0.841511	0.27059	0.405885	0.541181	0.676476	0.811771	0.947066	0.0823611	0.217656	0.352951	0.488246	0.164722	0.111788	0.247083	0.73533	0.352951
0.90535	0.269317	0.8107	0.71605	0.621401	0.526751	0.432101	0.337451	0.242801	0.148151	0.0535014	0.958852	0.485602	0.823053	0.728403	0.687255	0.0535014
0.219745	0.415395	0.439489	0.659234	0.878978	0.098723	0.318468	0.538212	0.757957	0.977701	0.197446	0.417191	0.515914	0.0541258	0.27387	0.691061	0.197446
0.247523	0.537304	0.495047	0.74257	0.990094	0.237617	0.48514	0.732664	0.980187	0.22771	0.475234	0.722757	0.960374	0.693038	0.940561	0.663318	0.475234
0.125379	0.467917	0.250758	0.376136	0.501515	0.626894	0.752273	0.877652	0.00303029	0.128409	0.253788	0.379167	0.00606059	0.883712	0.00909088	0.388258	0.253788
0.241267	0.287212	0.482534	0.723801	0.965069	0.206336	0.447603	0.68887	0.930137	0.171404	0.412671	0.653938	0.860274	0.549144	0.790411	0.44435	0.412671
0.976754	0.178328	0.953508	0.930261	0.907015	0.883769	0.860523	0.837277	0.814031	0.790784	0.767538	0.744292	0.628061	0.465338	0.442092	0.186384	0.767538
0.301526	0.15372	0.603053	0.904579	0.206105	0.507632	0.809158	0.110684	0.412211	0.713737	0.0152635	0.31679	0.824422	0.935106	0.236632	0.553422	0.0152635
0.753343	0.571655	0.506686	0.260028	0.0133713	0.766714	0.520057	0.2734	0.0267425	0.780085	0.533428	0.286771	0.053485	0.326885	0.0802275	0.366998	0.533428
0.432662	0.802406	0.865324	0.297986	0.730648	0.16331	0.595972	0.0286339	0.461296	0.893958	0.32662	0.759282	0.922592	0.951226	0.383888	0.143169	0.32662
0.749978	0.0330538	0.499956	0.249935	0.999913	0.749891	0.499869	0.249848	0.999826	0.749804	0.499782	0.249761	0.999652	0.2495	0.999478	0.249239	0.499782
0.884405	0.53445	0.76881	0.653215	0.537619	0.422024	0.306429	0.190834	0.0752388	0.959644	0.844049	0.728453	0.150478	0.341312	0.225717	0.95417	0.844049
0.192418	0.49848	0.384836	0.577254	0.769672	0.96209	0.154508	0.346926	0.539344	0.731762	0.92418	0.116598	0.0786883	0.425614	0.618033	0.734631	0.92418
0.969683	0.955361	0.939366	0.909049	0.878732	0.848415	0.818098	0.787781	0.757464	0.727147	0.69683	0.666513	0.514928	0.302708	0.272391	0.938904	0.69683
0.461725	0.748293	0.92345	0.385175	0.8469	0.308625	0.77035	0.232074	0.693799	0.155524	0.617249	0.0789742	0.387599	0.619673	0.0813982	0.160372	0.617249
0.210847	0.554584	0.421694	0.632541	0.843388	0.0542348	0.265082	0.475929	0.686776	0.897623	0.10847	0.319317	0.373551	0.84948	0.0603269	0.379643	0.10847
0.704789	0.890737	0.409579	0.114368	0.819157	0.523946	0.228736	0.933525	0.638314	0.343103	0.0478926	0.752682	0.276628	0.210153	0.914942	0.667624	0.0478926
0.393082	0.624849	0.786163	0.179245	0.572326	0.965408	0.35849	0.751571	0.144653	0.537735	0.930816	0.323898	0.289306	0.0408772	0.433959	0.757857	0.930816
0.522765	0.84204	0.0455295	0.568294	0.091059	0.613824	0.136589	0.659353	0.182118	0.704883	0.227648	0.750412	0.364236	0.0235893	0.546354	0.296766	0.227648
0.10717	0.159768	0.21434	0.32151	0.42868	0.53585	0.64302	0.75019	0.85736	0.96453	0.0717005	0.178871	0.714721	0.464911	0.572081	0.750952	0.0717005
0.207079	0.212752	0.414157	0.621236	0.828315	0.0353935	0.242472	0.449551	0.65663	0.863708	0.0707869	0.277866	0.313259	0.76281	0.969889	0.247754	0.0707869
0.371579	0.71471	0.743157	0.114736	0.486315	0.857893	0.229472	0.601051	0.97263	0.344208	0.715787	0.0873657	0.945259	0.54631	0.917889	0.00525439	0.715787
0.123157	0.130427	0.246315	0.369472	0.49263	0.615787	0.738945	0.862102	0.98526	0.108417	0.231575	0.354732	0.97052	0.832622	0.95578	0.310512	0.231575
0.908046	0.0909903	0.816091	0.724137	0.632183	0.540229	0.448274	0.35632	0.264366	0.172411	0.0804572	0.988503	0.528731	0.885051	0.793097	0.7816	0.0804572
0.524358	0.274588	0.0487158	0.573074	0.0974316	0.62179	0.146147	0.670505	0.194863	0.719221	0.243579	0.767937	0.389726	0.0602318	0.58459	0.352527	0.243579
0.883277	0.0029996	0.766554	0.64983	0.533107	0.416384	0.299661	0.182937	0.0662141	0.949491	0.832768	0.716044	0.132428	0.315365	0.198642	0.914686	0.832768
0.232444	0.414293	0.464887	0.697331	0.929775	0.162218	0.394662	0.627106	0.859549	0.0919932	0.324437	0.556881	0.719099	0.346205	0.578648	0.135529	0.324437
0.681034	0.0268763	0.362069	0.0431028	0.724137	0.405171	0.0862055	0.76724	0.448274	0.129308	0.810343	0.491377	0.896548	0.663788	0.344822	0.836199	0.810343
0.142703	0.70982	0.285406	0.428109	0.570812	0.713515	0.856218	0.998921	0.141624	0.284327	0.42703	0.569733	0.283248	0.282168	0.424871	0.994604	0.42703
0.408852	0.937897	0.817705	0.226557	0.635409	0.0442619	0.453114	0.861967	0.270819	0.679671	0.0885237	0.497376	0.541638	0.403605	0.812457	0.309833	0.0885237
0.581848	0.239911	0.163696	0.745545	0.327393	0.909241	0.491089	0.0729377	0.654786	0.236634	0.818482	0.400331	0.309572	0.382509	0.964358	0.364688	0.818482
0.123304	0.180896	0.246607	0.369911	0.493215	0.616518	0.739822	0.863126	0.986429	0.109733	0.233037	0.35634	0.972859	0.835984	0.959288	0.315628	0.233037
0.364594	0.31754	0.729189	0.093783	0.458377	0.822972	0.187566	0.55216	0.916755	0.281349	0.645943	0.0105376	0.833509	0.385669	0.750264	0.760801	0.645943
0.736838	0.886991	0.473676	0.210514	0.947352	0.68419	0.421028	0.157866	0.894705	0.631543	0.368381	0.105219	0.789409	0.947276	0.684114	0.789332	0.368381
0.0374127	0.652059	0.0748253	0.112238	0.149651	0.187063	0.224476	0.261889	0.299301	0.336714	0.374127	0.411539	0.598602	0.860491	0.897904	0.309443	0.374127
0.794502	0.150335	0.589004	0.383506	0.178008	0.97251	0.767012	0.561514	0.356016	0.150518	0.94502	0.739521	0.712031	0.273545	0.0680468	0.807568	0.94502
0.19428	0.681346	0.388561	0.582841	0.777122	0.971402	0.165683	0.359963	0.554243	0.748524	0.942804	0.137085	0.108487	0.46845	0.66273	0.799815	0.942804
0.271067	0.385815	0.542134	0.8132	0.0842673	0.355334	0.626401	0.897468	0.168535	0.439601	0.710668	0.981735	0.337069	0.234537	0.505604	0.487339	0.710668
0.820034	0.387725	0.640069	0.460103	0.280138	0.100172	0.920206	0.740241	0.560275	0.38031	0.200344	0.0203783	0.12055	0.860791	0.680825	0.701204	0.200344
0.318044	0.499741	0.636087	0.954131	0.272174	0.590218	0.908261	0.226305	0.544349	0.862392	0.180436	0.498479	0.0886973	0.315002	0.633046	0.131525	0.180436
0.358464	0.147533	0.716928	0.0753922	0.433856	0.79232	0.150784	0.509248	0.867712	0.226177	0.584641	0.943105	0.735425	0.244673	0.603137	0.546242	0.584641
0.705465	0.587187	0.41093	0.116395	0.821861	0.527326	0.232791	0.938256	0.643721	0.349186	0.0546513	0.760116	0.287442	0.225698	0.931163	0.69128	0.0546513
0.752423	0.845576	0.504845	0.257268	0.00969065	0.762113	0.514536	0.266959	0.0193813	0.771804	0.524227	0.276649	0.0387626	0.305721	0.0581439	0.334793	0.524227
0.967694	0.590109	0.935387	0.903081	0.870775	0.838469	0.806162	0.773856	0.74155	0.709243	0.676937	0.644631	0.483099	0.256955	0.224649	0.86928	0.676937
0.028305	0.955409	0.0566101	0.0849151	0.11322	0.141525	0.16983	0.198135	0.22644	0.254745	0.28305	0.311356	0.452881	0.651016	0.679321	0.990677	0.28305
0.722905	0.556146	0.44581	0.168715	0.89162	0.614524	0.337429	0.0603343	0.783239	0.506144	0.229049	0.951954	0.566478	0.626813	0.349717	0.301671	0.229049
0.862536	0.148152	0.725072	0.587609	0.450145	0.312681	0.175217	0.0377536	0.90029	0.762826	0.625362	0.487899	0.80058	0.838333	0.70087	0.188768	0.625362
0.646419	0.983305	0.292837	0.939256	0.585675	0.232093	0.878512	0.52493	0.171349	0.817768	0.464186	0.110605	0.342698	0.867628	0.514047	0.624652	0.464186
0.357867	0.408767	0.715734	0.0736014	0.431469	0.789336	0.147203	0.50507	0.862937	0.220804	0.578671	0.936538	0.725874	0.230944	0.588811	0.52535	0.578671
0.67285	0.14182	0.3457	0.0185506	0.691401	0.364251	0.0371012	0.709951	0.382802	0.0556518	0.728502	0.401352	0.765603	0.475555	0.148405	0.549757	0.728502
0.59334	0.564899	0.186679	0.780019	0.373359	0.966699	0.560038	0.153378	0.746718	0.340058	0.933397	0.526737	0.493436	0.646814	0.240153	0.76689	0.933397
0.260777	0.252126	0.521554	0.782332	0.0431089	0.303886	0.564663	0.825441	0.0862178	0.346995	0.607772	0.868549	0.172436	0.997876	0.258653	0.127203	0.607772
0.882843	0.488515	0.765685	0.648528	0.53137	0.414213	0.297055	0.179898	0.0627401	0.945583	0.828425	0.711268	0.12548	0.305378	0.18822	0.899488	0.828425
0.934033	0.464031	0.868067	0.8021	0.736134	0.670167	0.604201	0.538234	0.472268	0.406301	0.340335	0.274368	0.944536	0.48277	0.416803	0.691171	0.340335
0.300541	0.961095	0.601083	0.901624	0.202166	0.502707	0.803249	0.10379	0.404331	0.704873	0.00541437	0.305956	0.808663	0.912453	0.212994	0.51895	0.00541437
0.199938	0.126031	0.399876	0.599814	0.799752	0.999689	0.199627	0.399565	0.599503	0.799441	0.999379	0.199317	0.199006	0.598572	0.798509	0.997826	0.999379
0.356178	0.199757	0.712357	0.068535	0.424713	0.780892	0.13707	0.493248	0.849427	0.205605	0.561783	0.917962	0.698854	0.192102	0.54828	0.466242	0.561783
0.289505	0.31925	0.579009	0.868514	0.158019	0.447523	0.737028	0.0265326	0.316037	0.605542	0.895047	0.184551	0.632074	0.658607	0.948112	0.132663	0.895047
0.704726	0.629269	0.409452	0.114178	0.818904	0.52363	0.228356	0.933083	0.637809	0.342535	0.0472608	0.751987	0.275617	0.2087	0.913426	0.665413	0.0472608
0.331145	0.126712	0.66229	0.993435	0.32458	0.655725	0.98687	0.318015	0.64916	0.980305	0.311451	0.642596	0.298321	0.616336	0.947481	0.590077	0.311451
0.554905	0.651254	0.10981	0.664715	0.21962	0.774525	0.32943	0.884335	0.43924	0.994145	0.54905	0.103955	0.87848	0.762814	0.317719	0.421674	0.54905
0.287817	0.621634	0.575635	0.863452	0.15127	0.439087	0.726904	0.0147216	0.302539	0.590356	0.878174	0.165991	0.605078	0.6198	0.907617	0.0736081	0.878174
0.346628	0.803073	0.693257	0.0398852	0.386514	0.733142	0.0797704	0.426399	0.773027	0.119656	0.466284	0.812912	0.546054	0.972453	0.319081	0.131994	0.466284
0.783436	0.247842	0.566872	0.350308	0.133744	0.91718	0.700616	0.484052	0.267488	0.0509236	0.83436	0.617795	0.534975	0.0190269	0.802463	0.420258	0.83436
0.208042	0.476432	0.416084	0.624127	0.832169	0.040211	0.248253	0.456295	0.664338	0.87238	0.080422	0.288464	0.328675	0.784971	0.993013	0.281477	0.080422
0.565205	0.389314	0.130411	0.695616	0.260822	0.826027	0.391233	0.956438	0.521643	0.0868488	0.652054	0.21726	0.0432867	0.999725	0.56493	0.78219	0.652054
0.40752	0.20325	0.81504	0.222561	0.630081	0.037601	0.445121	0.852641	0.260162	0.667682	0.0752019	0.482722	0.520323	0.372964	0.780485	0.263207	0.0752019
0.191858	0.0283752	0.383716	0.575574	0.767432	0.95929	0.151148	0.343006	0.534864	0.726722	0.91858	0.110438	0.0697281	0.412734	0.604592	0.71503	0.91858
0.557472	0.901673	0.114944	0.672416	0.229889	0.787361	0.344833	0.902305	0.459777	0.0172495	0.574722	0.132194	0.919555	0.82186	0.379332	0.511526	0.574722
0.434646	0.426497	0.869292	0.303938	0.738584	0.173229	0.607875	0.0425212	0.477167	0.911813	0.346459	0.781105	0.954334	0.996855	0.431501	0.212606	0.346459
0.0934262	0.142021	0.186852	0.280279	0.373705	0.467131	0.560557	0.653983	0.74741	0.840836	0.934262	0.0276881	0.494819	0.148802	0.242229	0.269917	0.934262
0.213934	0.947487	0.427869	0.641803	0.855738	0.0696721	0.283607	0.497541	0.711475	0.92541	0.139344	0.353279	0.422951	0.920492	0.134426	0.487705	0.139344
0.595887	0.410313	0.191774	0.787661	0.383548	0.979435	0.575323	0.17121	0.767097	0.362984	0.958871	0.554758	0.534194	0.705403	0.30129	0.856048	0.958871
0.0744294	0.131189	0.148859	0.223288	0.297717	0.372147	0.446576	0.521006	0.595435	0.669864	0.744294	0.818723	0.19087	0.711876	0.786305	0.605028	0.744294
0.934461	0.885648	0.868923	0.803384	0.737845	0.672306	0.606768	0.541229	0.47569	0.410151	0.344613	0.279074	0.95138	0.492609	0.42707	0.706144	0.344613
0.490361	0.0921736	0.980722	0.471082	0.961443	0.451804	0.942165	0.432525	0.922886	0.413247	0.903608	0.393969	0.845772	0.278298	0.768659	0.162627	0.903608
0.49362	0.162199	0.98724	0.480861	0.974481	0.468101	0.961721	0.455342	0.948962	0.442582	0.936202	0.429822	0.897924	0.353265	0.846885	0.276708	0.936202
0.275098	0.0710636	0.550196	0.825294	0.100392	0.37549	0.650588	0.925686	0.200784	0.475882	0.75098	0.0260777	0.401568	0.327253	0.602351	0.628429	0.75098
0.571598	0.365339	0.143196	0.714795	0.286393	0.857991	0.429589	0.00118769	0.572786	0.144384	0.715982	0.287581	0.145572	0.14676	0.718358	0.00593846	0.715982
0.851651	0.253057	0.703301	0.554952	0.406602	0.258253	0.109903	0.961554	0.813205	0.664855	0.516506	0.368156	0.626409	0.587963	0.439614	0.80777	0.516506
0.691012	0.135109	0.382025	0.073037	0.764049	0.455062	0.146074	0.837086	0.528099	0.219111	0.910123	0.601136	0.0561974	0.893284	0.584296	0.185432	0.910123
0.844304	0.783153	0.688609	0.532913	0.377217	0.221521	0.0658256	0.91013	0.754434	0.598738	0.443043	0.287347	0.508868	0.418998	0.263302	0.550649	0.443043
0.221804	0.455307	0.443608	0.665412	0.887216	0.10902	0.330824	0.552627	0.774431	0.996235	0.218039	0.439843	0.548863	0.10149	0.323294	0.763137	0.218039
0.858593	0.349524	0.717185	0.575778	0.434371	0.292963	0.151556	0.0101488	0.868742	0.727334	0.585927	0.44452	0.737483	0.747632	0.606225	0.0507442	0.585927
0.367378	0.4523	0.734757	0.102135	0.469513	0.836892	0.20427	0.571648	0.939027	0.306405	0.673783	0.0411616	0.878053	0.449702	0.81708	0.858241	0.673783
0.527561	0.808945	0.055123	0.582684	0.110246	0.637807	0.165369	0.69293	0.220492	0.748053	0.275615	0.803176	0.440984	0.133914	0.661476	0.464652	0.275615
0.726068	0.931674	0.452135	0.178203	0.90427	0.630338	0.356406	0.0824732	0.808541	0.534608	0.260676	0.986744	0.617082	0.699555	0.425622	0.412366	0.260676
0.0181719	0.651646	0.0363437	0.0545156	0.0726874	0.0908593	0.109031	0.127203	0.145375	0.163547	0.181719	0.19989	0.29075	0.417953	0.436124	0.636015	0.181719
0.414348	0.215248	0.828696	0.243043	0.657391	0.0717391	0.486087	0.900435	0.314783	0.72913	0.143478	0.557826	0.629565	0.53	0.944348	0.502174	0.143478
0.943892	0.679592	0.887784	0.831676	0.775568	0.71946	0.663352	0.607244	0.551136	0.495028	0.43892	0.382812	0.102272	0.709515	0.653407	0.0362192	0.43892
0.992456	0.908922	0.984913	0.977369	0.969825	0.962282	0.954738	0.947194	0.939651	0.932107	0.924563	0.91702	0.879301	0.826496	0.818952	0.735971	0.924563
0.213499	0.250126	0.426998	0.640497	0.853996	0.0674945	0.280993	0.494492	0.707991	0.92149	0.134989	0.348488	0.415982	0.910475	0.123973	0.472461	0.134989
0.275868	0.86086	0.551737	0.827605	0.103473	0.379341	0.65521	0.931078	0.206946	0.482814	0.758683	0.034551	0.413892	0.34497	0.620839	0.65539	0.758683
0.518103	0.471262	0.036207	0.55431	0.072414	0.590517	0.108621	0.626724	0.144828	0.662931	0.181035	0.699138	0.289656	0.91638	0.434484	0.133622	0.181035
0.765402	0.505956	0.530803	0.296205	0.0616064	0.827008	0.59241	0.357811	0.123213	0.888614	0.654016	0.419418	0.246426	0.604237	0.369638	0.789056	0.654016
0.104673	0.600394	0.209345	0.314018	0.41869	0.523363	0.628035	0.732708	0.83738	0.942053	0.0467251	0.151398	0.67476	0.407468	0.51214	0.663538	0.0467251
0.230934	0.817561	0.461868	0.692802	0.923737	0.154671	0.385605	0.616539	0.847473	0.0784073	0.309341	0.540276	0.694946	0.311485	0.54242	0.0826951	0.309341
0.310207	0.755844	0.620414	0.930621	0.240828	0.551035	0.861242	0.171449	0.481655	0.791862	0.102069	0.412276	0.963311	0.13476	0.444966	0.857243	0.102069
0.647964	0.462245	0.295927	0.943891	0.591854	0.239818	0.887782	0.535745	0.183709	0.831672	0.479636	0.1276	0.367418	0.903163	0.551126	0.678726	0.479636
0.324234	0.951367	0.648468	0.972703	0.296937	0.621171	0.945405	0.269639	0.593874	0.918108	0.242342	0.566576	0.187747	0.457386	0.781621	0.348197	0.242342
0.404041	0.632739	0.808081	0.212122	0.616162	0.0202027	0.424243	0.828284	0.232324	0.636365	0.0404054	0.444446	0.464649	0.292932	0.696973	0.141419	0.0404054
0.709345	0.43933	0.41869	0.128035	0.83738	0.546725	0.25607	0.965415	0.67476	0.384105	0.0934502	0.802795	0.34952	0.314935	0.0242804	0.827076	0.0934502
0.961724	0.824697	0.923447	0.885171	0.846894	0.808618	0.770341	0.732065	0.693788	0.655512	0.617235	0.578959	0.387576	0.119641	0.0813641	0.660323	0.617235
0.686965	0.688981	0.37393	0.0608944	0.747859	0.434824	0.121789	0.808754	0.495718	0.182683	0.869648	0.556613	0.991437	0.80019	0.487155	0.0437677	0.869648
0.817229	0.702207	0.634457	0.451686	0.268915	0.0861437	0.903372	0.720601	0.53783	0.355059	0.172287	0.989516	0.0756598	0.796261	0.61349	0.603006	0.172287
0.163441	0.987145	0.326882	0.490323	0.653764	0.817205	0.980646	0.144087	0.307528	0.470968	0.634409	0.79785	0.615055	0.759142	0.922583	0.720433	0.634409
0.951887	0.954415	0.903774	0.855662	0.807549	0.759436	0.711323	0.66321	0.615097	0.566985	0.518872	0.470759	0.230195	0.893405	0.845292	0.316052	0.518872
0.367945	0.85127	0.73589	0.103835	0.47178	0.839725	0.207671	0.575616	0.943561	0.311506	0.679451	0.047396	0.887121	0.462737	0.830682	0.878078	0.679451
0.0531216	0.289316	0.106243	0.159365	0.212486	0.265608	0.31873	0.371851	0.424973	0.478095	0.531216	0.584338	0.849946	0.221797	0.274919	0.859256	0.531216
0.814932	0.537426	0.629865	0.444797	0.259729	0.0746616	0.889594	0.704526	0.519459	0.334391	0.149323	0.964256	0.0389171	0.743443	0.558376	0.522631	0.149323
0.567474	0.514435	0.134948	0.702422	0.269896	0.83737	0.404844	0.972318	0.539792	0.107266	0.67474	0.242214	0.0795836	0.0519014	0.619375	0.861589	0.67474
0.535063	0.103434	0.0701266	0.60519	0.140253	0.675317	0.21038	0.745443	0.280506	0.81557	0.350633	0.885696	0.561013	0.306456	0.841519	0.727216	0.350633
0.808986	0.414028	0.617972	0.426958	0.235944	0.0449297	0.853916	0.662902	0.471888	0.280873	0.0898594	0.898845	0.943775	0.606677	0.415663	0.314508	0.0898594
0.626687	0.576717	0.253375	0.880062	0.506749	0.133436	0.760124	0.386811	0.0134984	0.640186	0.266873	0.89356	0.0269967	0.413808	0.0404951	0.934055	0.266873
0.733384	0.876566	0.466769	0.200153	0.933537	0.666922	0.400306	0.13369	0.867075	0.600459	0.333843	0.0672275	0.734149	0.867839	0.601224	0.668451	0.333843
0.990281	0.440039	0.980561	0.970842	0.961122	0.951403	0.941684	0.931964	0.922245	0.912525	0.902806	0.893087	0.844489	0.776454	0.766734	0.659821	0.902806
0.645908	0.729748	0.291815	0.937723	0.583631	0.229538	0.875446	0.521354	0.167262	0.813169	0.459077	0.104985	0.334523	0.855877	0.501785	0.606769	0.459077
0.770673	0.869264	0.541346	0.312019	0.0826921	0.853365	0.624038	0.394711	0.165384	0.936057	0.70673	0.477403	0.330769	0.72548	0.496153	0.973556	0.70673
0.701708	0.715642	0.403417	0.105125	0.806833	0.508541	0.21025	0.911958	0.613666	0.315374	0.0170827	0.718791	0.227332	0.13929	0.840999	0.55979	0.0170827
0.610958	0.80072	0.221916	0.832874	0.443833	0.0547907	0.665749	0.276707	0.887665	0.498623	0.109581	0.72054	0.77533	0.0520374	0.662996	0.383535	0.109581
0.373579	0.706535	0.747158	0.120737	0.494316	0.867896	0.241475	0.615054	0.988633	0.362212	0.735791	0.10937	0.977266	0.592319	0.965898	0.0752686	0.735791
0.74398	0.741716	0.48796	0.231939	0.975919	0.719899	0.463879	0.207859	0.951838	0.695818	0.439798	0.183778	0.903677	0.111535	0.855515	0.0392926	0.439798
0.0683249	0.0190924	0.13665	0.204975	0.273299	0.341624	0.409949	0.478274	0.546599	0.614924	0.683249	0.751574	0.0931979	0.571472	0.639797	0.39137	0.683249
0.336051	0.886031	0.672102	0.00815268	0.344204	0.680254	0.0163054	0.352356	0.688407	0.024458	0.360509	0.69656	0.376814	0.729171	0.0652214	0.761781	0.360509
0.00734865	0.524987	0.0146973	0.022046	0.0293946	0.0367433	0.0440919	0.0514406	0.0587892	0.0661379	0.0734865	0.0808352	0.117578	0.169019	0.176368	0.257203	0.0734865
0.508841	0.463323	0.0176823	0.526523	0.0353646	0.544206	0.0530469	0.561888	0.0707291	0.57957	0.0884114	0.597253	0.141458	0.703346	0.212187	0.80944	0.0884114
0.0930707	0.0651939	0.186141	0.279212	0.372283	0.465354	0.558424	0.651495	0.744566	0.837637	0.930707	0.023778	0.489132	0.140627	0.233698	0.257476	0.930707
0.239777	0.713422	0.479554	0.719332	0.959109	0.198886	0.438663	0.67844	0.918218	0.157995	0.397772	0.637549	0.836435	0.514875	0.754653	0.392202	0.397772
0.935299	0.488943	0.870599	0.805898	0.741197	0.676496	0.611796	0.547095	0.482394	0.417693	0.352993	0.288292	0.964788	0.511883	0.447182	0.735474	0.352993
0.574601	0.667679	0.149202	0.723803	0.298404	0.873005	0.447606	0.0222069	0.596808	0.171409	0.74601	0.320611	0.193616	0.215823	0.790424	0.111034	0.74601
0.318709	0.682049	0.637418	0.956128	0.274837	0.593546	0.912255	0.230964	0.549674	0.868383	0.187092	0.505801	0.0993473	0.330312	0.649021	0.154822	0.187092
0.545656	0.199555	0.0913126	0.636969	0.182625	0.728281	0.273938	0.819594	0.36525	0.910907	0.456563	0.00221915	0.730501	0.550095	0.0957509	0.09797	0.456563
0.845206	0.916634	0.690412	0.535618	0.380824	0.22603	0.0712366	0.916443	0.761649	0.606855	0.452061	0.297267	0.523298	0.43974	0.284946	0.582213	0.452061
0.378891	0.865883	0.757781	0.136672	0.515563	0.894453	0.273344	0.652235	0.0311252	0.410016	0.788907	0.167797	0.0622505	0.714485	0.0933757	0.261173	0.788907
0.0152181	0.890019	0.0304363	0.0456544	0.0608725	0.0760906	0.0913088	0.106527	0.121745	0.136963	0.152181	0.167399	0.24349	0.350017	0.365235	0.532635	0.152181
0.771108	0.543948	0.542217	0.313325	0.0844338	0.855542	0.626651	0.397759	0.168868	0.939976	0.711085	0.482193	0.337735	0.735495	0.506603	0.988796	0.711085
0.0199036	0.139195	0.0398071	0.0597107	0.0796142	0.0995178	0.119421	0.139325	0.159228	0.179132	0.199036	0.218939	0.318457	0.457782	0.477685	0.696624	0.199036
0.518979	0.450347	0.0379588	0.556938	0.0759176	0.594897	0.113876	0.632856	0.151835	0.670815	0.189794	0.708773	0.30367	0.936526	0.455505	0.164279	0.189794
0.486599	0.989362	0.973197	0.459796	0.946395	0.432993	0.919592	0.406191	0.89279	0.379388	0.865987	0.352586	0.785579	0.19177	0.678369	0.0309542	0.865987
0.264187	0.215532	0.528375	0.792562	0.0567493	0.320937	0.585124	0.849311	0.113499	0.377686	0.641873	0.90606	0.226997	0.0763083	0.340496	0.246556	0.641873
0.196245	0.446023	0.392489	0.588734	0.784979	0.981223	0.177468	0.373712	0.569957	0.766202	0.962446	0.158691	0.139914	0.513626	0.709871	0.868562	0.962446
0.283452	0.315732	0.566903	0.850355	0.133806	0.417258	0.700709	0.984161	0.267612	0.551064	0.834515	0.117967	0.535224	0.519385	0.802836	0.920803	0.834515
0.969588	0.514659	0.939175	0.908763	0.878351	0.847939	0.817526	0.787114	0.756702	0.726289	0.695877	0.665465	0.513403	0.300518	0.270105	0.93557	0.695877
0.860778	0.881504	0.721557	0.582335	0.443114	0.303892	0.164671	0.0254494	0.886228	0.747006	0.607785	0.468563	0.772456	0.797905	0.658684	0.127247	0.607785
0.10398	0.439726	0.20796	0.31194	0.41592	0.5199	0.62388	0.72786	0.83184	0.93582	0.0397997	0.14378	0.663679	0.391539	0.495519	0.639299	0.0397997
0.591292	0.467532	0.182583	0.773875	0.365167	0.956458	0.54775	0.139042	0.730334	0.321625	0.912917	0.504209	0.460667	0.599709	0.191001	0.695209	0.912917
0.839396	0.80665	0.678791	0.518187	0.357582	0.196978	0.0363737	0.875769	0.715165	0.554561	0.393956	0.233352	0.43033	0.306099	0.145495	0.378847	0.393956
0.722214	0.365158	0.444428	0.166643	0.888857	0.611071	0.333285	0.0554993	0.777714	0.499928	0.222142	0.944356	0.555427	0.610926	0.333141	0.277497	0.222142
0.253933	0.211519	0.507866	0.761799	0.0157326	0.269666	0.523599	0.777532	0.0314652	0.285398	0.539332	0.793265	0.0629304	0.840462	0.0943956	0.88766	0.539332
0.854475	0.999117	0.70895	0.563425	0.4179	0.272375	0.126851	0.981326	0.835801	0.690276	0.544751	0.399226	0.671601	0.652927	0.507402	0.906628	0.544751
0.162826	0.153604	0.325651	0.488477	0.651302	0.814128	0.976953	0.139779	0.302604	0.46543	0.628255	0.791081	0.605209	0.744988	0.907813	0.698894	0.628255
0.608972	0.630488	0.217945	0.826917	0.435889	0.0448619	0.653834	0.262807	0.871779	0.480751	0.0897237	0.698696	0.743558	0.00636453	0.615337	0.314033	0.0897237
0.998638	0.61635	0.997276	0.995914	0.994551	0.993189	0.991827	0.990465	0.989103	0.987741	0.986379	0.985016	0.978206	0.968671	0.967308	0.952325	0.986379
0.106391	0.000595042	0.212781	0.319172	0.425563	0.531954	0.638344	0.744735	0.851126	0.957517	0.0639073	0.170298	0.702252	0.446987	0.553378	0.723676	0.0639073
0.109039	0.000879	0.218079	0.327118	0.436157	0.545196	0.654236	0.763275	0.872314	0.981354	0.0903928	0.199432	0.744628	0.507903	0.616943	0.816375	0.0903928
0.623174	0.773352	0.246347	0.869521	0.492695	0.115868	0.739042	0.362215	0.985389	0.608563	0.231736	0.85491	0.970778	0.332994	0.956167	0.811077	0.231736
0.679249	0.727335	0.358498	0.0377469	0.716996	0.396245	0.0754939	0.754743	0.433992	0.113241	0.79249	0.471739	0.867984	0.622726	0.301975	0.773714	0.79249
0.137562	0.319178	0.275123	0.412685	0.550246	0.687808	0.825369	0.962931	0.100492	0.238054	0.375615	0.513177	0.200985	0.163915	0.301477	0.814654	0.375615
0.996704	0.417724	0.993408	0.990112	0.986816	0.983521	0.980225	0.976929	0.973633	0.970337	0.967041	0.963745	0.947266	0.924195	0.920899	0.884644	0.967041
0.60614	0.682494	0.21228	0.81842	0.424561	0.0307008	0.636841	0.242981	0.849121	0.455261	0.0614016	0.667542	0.698243	0.941224	0.547364	0.214906	0.0614016
0.397729	0.680562	0.795457	0.193186	0.590915	0.988643	0.386372	0.784101	0.181829	0.579558	0.977287	0.375015	0.363659	0.14776	0.545488	0.920504	0.977287
0.625907	0.205262	0.251814	0.877722	0.503629	0.129536	0.755443	0.38135	0.00725765	0.633165	0.259072	0.884979	0.0145153	0.395866	0.021773	0.906752	0.259072
0.622416	0.83642	0.244831	0.867247	0.489663	0.112079	0.734494	0.35691	0.979326	0.601742	0.224157	0.846573	0.958652	0.315562	0.937978	0.784551	0.224157
0.94145	0.708921	0.882899	0.824349	0.765798	0.707248	0.648697	0.590147	0.531596	0.473046	0.414495	0.355945	0.0631922	0.653339	0.594788	0.950733	0.414495
0.942007	0.828708	0.884014	0.826021	0.768028	0.710035	0.652041	0.594048	0.536055	0.478062	0.420069	0.362076	0.0721106	0.666159	0.608166	0.970242	0.420069
0.310171	0.0945488	0.620342	0.930513	0.240684	0.550855	0.861025	0.171196	0.481367	0.791538	0.101709	0.41188	0.962735	0.133931	0.444102	0.855982	0.101709
0.0425783	0.0817376	0.0851566	0.127735	0.170313	0.212891	0.25547	0.298048	0.340626	0.383205	0.425783	0.468361	0.681253	0.979301	0.0218789	0.49024	0.425783
0.613246	0.764005	0.226491	0.839737	0.452983	0.0662287	0.679474	0.29272	0.905966	0.519212	0.132457	0.745703	0.811932	0.104652	0.717898	0.463601	0.132457
0.821158	0.629572	0.642316	0.463474	0.284632	0.105791	0.926949	0.748107	0.569265	0.390423	0.211581	0.0327392	0.13853	0.886637	0.707795	0.740534	0.211581
0.20434	0.213852	0.408681	0.613021	0.817362	0.0217024	0.226043	0.430383	0.634724	0.839064	0.0434048	0.247745	0.269448	0.699831	0.904171	0.151917	0.0434048
0.350375	0.213547	0.70075	0.0511256	0.401501	0.751876	0.102251	0.452626	0.803002	0.153377	0.503752	0.854127	0.606003	0.0586296	0.409005	0.263132	0.503752
0.755984	0.0810608	0.511968	0.267952	0.0239358	0.77992	0.535904	0.291888	0.0478715	0.803855	0.559839	0.315823	0.095743	0.387631	0.143615	0.459438	0.559839
0.822075	0.388823	0.644151	0.466226	0.288301	0.110377	0.932452	0.754527	0.576603	0.398678	0.220753	0.0428285	0.153205	0.907732	0.729808	0.772636	0.220753
0.619862	0.95216	0.239723	0.859585	0.479447	0.0993087	0.71917	0.339032	0.958894	0.578756	0.198617	0.818479	0.917788	0.25682	0.876682	0.695161	0.198617
0.0163029	0.947545	0.0326058	0.0489087	0.0652117	0.0815146	0.0978175	0.11412	0.130423	0.146726	0.163029	0.179332	0.260847	0.374967	0.39127	0.570602	0.163029
0.00305827	0.389854	0.00611655	0.00917482	0.0122331	0.0152914	0.0183496	0.0214079	0.0244662	0.0275245	0.0305827	0.033641	0.0489324	0.0703403	0.0733986	0.10704	0.0305827
0.400424	0.269215	0.800847	0.201271	0.601694	0.00211808	0.402542	0.802965	0.203389	0.603813	0.00423616	0.40466	0.406778	0.209743	0.610167	0.0148266	0.00423616
0.91972	0.692169	0.83944	0.75916	0.67888	0.598601	0.518321	0.438041	0.357761	0.277481	0.197201	0.116921	0.715522	0.153563	0.0732828	0.190204	0.197201
0.736021	0.284035	0.472043	0.208064	0.944086	0.680107	0.416129	0.15215	0.888172	0.624193	0.360215	0.0962364	0.776344	0.928494	0.664516	0.760752	0.360215
0.31317	0.776866	0.62634	0.939509	0.252679	0.565849	0.879019	0.192189	0.505358	0.818528	0.131698	0.444868	0.0107166	0.202905	0.516075	0.960943	0.131698
0.444592	0.783865	0.889184	0.333776	0.778368	0.22296	0.667552	0.112144	0.556736	0.00132778	0.44592	0.890512	0.113472	0.225615	0.670207	0.560719	0.44592
0.257332	0.42246	0.514665	0.771997	0.0293297	0.286662	0.543995	0.801327	0.0586595	0.315992	0.573324	0.830657	0.117319	0.918646	0.175978	0.00663521	0.573324
0.986227	0.282156	0.972454	0.958682	0.944909	0.931136	0.917363	0.90359	0.889817	0.876045	0.862272	0.848499	0.779635	0.683225	0.669452	0.517951	0.862272
0.520181	0.193967	0.0403616	0.560542	0.0807231	0.600904	0.121085	0.641266	0.161446	0.681627	0.201808	0.721989	0.322893	0.964158	0.484339	0.206328	0.201808
0.678491	0.0113162	0.356981	0.0354715	0.713962	0.392453	0.070943	0.749434	0.427924	0.106415	0.784905	0.463396	0.855848	0.605282	0.283772	0.747168	0.784905
0.389916	0.191824	0.779833	0.169749	0.559666	0.949582	0.339499	0.729415	0.119332	0.509248	0.899165	0.289081	0.238664	0.968079	0.357996	0.647077	0.899165
0.326612	0.983236	0.653224	0.979836	0.306448	0.63306	0.959672	0.286284	0.612896	0.939508	0.26612	0.592732	0.225792	0.512076	0.838688	0.43142	0.26612
0.368112	0.244054	0.736223	0.104335	0.472447	0.840558	0.20867	0.576781	0.944893	0.313005	0.681116	0.049228	0.889786	0.466568	0.834679	0.883907	0.681116
0.852301	0.819726	0.704602	0.556903	0.409203	0.261504	0.113805	0.966106	0.818407	0.670708	0.523008	0.375309	0.636813	0.602919	0.45522	0.830529	0.523008
0.62024	0.136455	0.240479	0.860719	0.480958	0.101198	0.721438	0.341677	0.961917	0.582156	0.202396	0.822636	0.923834	0.265511	0.88575	0.708386	0.202396
0.36701	0.398144	0.73402	0.101031	0.468041	0.835051	0.202061	0.569072	0.936082	0.303092	0.670102	0.0371127	0.872164	0.441236	0.808246	0.845359	0.670102
0.341247	0.60101	0.682494	0.0237411	0.364988	0.706235	0.0474823	0.388729	0.729976	0.0712234	0.41247	0.753718	0.459953	0.848682	0.189929	0.943647	0.41247
0.339119	0.17688	0.678238	0.0173563	0.356475	0.695594	0.0347127	0.373831	0.71295	0.052069	0.391188	0.730307	0.4259	0.799732	0.138851	0.869157	0.391188
0.569269	0.828355	0.138539	0.707808	0.277078	0.846347	0.415616	0.984886	0.554155	0.123425	0.692694	0.261963	0.10831	0.0931962	0.662466	0.924429	0.692694
0.71082	0.157731	0.421639	0.132459	0.843278	0.554098	0.264918	0.975737	0.686557	0.397376	0.108196	0.819016	0.373114	0.348851	0.0596703	0.878686	0.108196
0.744916	0.987937	0.489831	0.234747	0.979663	0.724579	0.469494	0.21441	0.959326	0.704241	0.449157	0.194073	0.918651	0.133061	0.877977	0.07205	0.449157
0.798419	0.257169	0.596838	0.395258	0.193677	0.992096	0.790515	0.588935	0.387354	0.185773	0.984192	0.782611	0.774708	0.363642	0.162061	0.944673	0.984192
0.0318352	0.233599	0.0636705	0.0955057	0.127341	0.159176	0.191011	0.222847	0.254682	0.286517	0.318352	0.350188	0.509364	0.73221	0.764046	0.114233	0.318352
0.0547433	0.101637	0.109487	0.16423	0.218973	0.273716	0.32846	0.383203	0.437946	0.49269	0.547433	0.602176	0.875893	0.259096	0.313839	0.916015	0.547433
0.070592	0.219411	0.141184	0.211776	0.282368	0.35296	0.423552	0.494144	0.564736	0.635328	0.70592	0.776512	0.129472	0.623615	0.694207	0.470719	0.70592
0.43927	0.634717	0.878539	0.317809	0.757079	0.196348	0.635618	0.0748876	0.514157	0.953427	0.392697	0.831966	0.0283144	0.103202	0.542472	0.374438	0.392697
0.805031	0.696007	0.610062	0.415093	0.220124	0.0251552	0.830186	0.635217	0.440248	0.245279	0.0503104	0.855341	0.880497	0.515714	0.320745	0.176086	0.0503104
0.156715	0.79477	0.31343	0.470145	0.62686	0.783574	0.940289	0.0970042	0.253719	0.410434	0.567149	0.723864	0.507438	0.604443	0.761157	0.485021	0.567149
0.907199	0.696243	0.814398	0.721597	0.628797	0.535996	0.443195	0.350394	0.257593	0.164792	0.0719915	0.979191	0.515186	0.86558	0.77278	0.75197	0.0719915
0.296058	0.75294	0.592115	0.888173	0.184231	0.480289	0.776346	0.072404	0.368462	0.664519	0.960577	0.256635	0.736924	0.809328	0.105385	0.36202	0.960577
0.842121	0.669521	0.684243	0.526364	0.368486	0.210607	0.0527285	0.89485	0.736971	0.579093	0.421214	0.263336	0.473943	0.368793	0.210914	0.47425	0.421214
0.53472	0.63343	0.0694395	0.604159	0.138879	0.673599	0.208318	0.743038	0.277758	0.812478	0.347197	0.881917	0.555516	0.298554	0.833273	0.71519	0.347197
0.0344481	0.0564407	0.0688962	0.103344	0.137792	0.17224	0.206688	0.241137	0.275585	0.310033	0.344481	0.378929	0.551169	0.792306	0.826754	0.205683	0.344481
0.968924	0.598217	0.937848	0.906772	0.875695	0.844619	0.813543	0.782467	0.751391	0.720315	0.689238	0.658162	0.502781	0.285248	0.254172	0.912334	0.689238
0.702904	0.227008	0.405808	0.108712	0.811615	0.514519	0.217423	0.920327	0.623231	0.326135	0.0290384	0.731942	0.246461	0.166788	0.869692	0.601634	0.0290384
0.704793	0.318778	0.409587	0.11438	0.819174	0.523967	0.22876	0.933554	0.638347	0.34314	0.0479338	0.752727	0.276694	0.210248	0.915041	0.667768	0.0479338
0.462361	0.699834	0.924721	0.387082	0.849443	0.311803	0.774164	0.236524	0.698885	0.161246	0.623606	0.085967	0.39777	0.634295	0.0966553	0.182622	0.623606
0.895265	0.117437	0.790531	0.685796	0.581062	0.476327	0.371592	0.266858	0.162123	0.0573885	0.952654	0.847919	0.324246	0.591104	0.486369	0.334289	0.952654
0.725482	0.762571	0.450964	0.176446	0.901928	0.627411	0.352893	0.0783749	0.803857	0.529339	0.254821	0.980303	0.607714	0.686089	0.411571	0.391874	0.254821
0.178046	0.526123	0.356093	0.534139	0.712186	0.890232	0.0682789	0.246325	0.424372	0.602418	0.780465	0.958511	0.848744	0.095069	0.273115	0.231627	0.780465
0.427164	0.553911	0.854329	0.281493	0.708657	0.135821	0.562986	0.99015	0.417314	0.844478	0.271643	0.698807	0.834628	0.824778	0.251942	0.950749	0.271643
0.349875	0.587989	0.69975	0.0496246	0.399499	0.749374	0.0992492	0.449124	0.798999	0.148874	0.498749	0.848624	0.597998	0.0471221	0.396997	0.245621	0.498749
0.346988	0.329666	0.693977	0.0409653	0.387954	0.734942	0.0819307	0.428919	0.775908	0.122896	0.469884	0.816873	0.551815	0.980734	0.327723	0.144596	0.469884
0.834832	0.702989	0.669663	0.504495	0.339326	0.174158	0.00898973	0.843821	0.678653	0.513485	0.348316	0.183148	0.357306	0.201127	0.0359589	0.219107	0.348316
0.0150612	0.143045	0.0301224	0.0451837	0.0602449	0.0753061	0.0903673	0.105429	0.12049	0.135551	0.150612	0.165673	0.24098	0.346408	0.361469	0.527143	0.150612
0.133959	0.161688	0.267917	0.401876	0.535834	0.669793	0.803751	0.93771	0.0716684	0.205627	0.339586	0.473544	0.143337	0.0810468	0.215005	0.688549	0.339586
0.441424	0.485325	0.882848	0.324273	0.765697	0.207121	0.648545	0.0899694	0.531394	0.972818	0.414242	0.855666	0.0627871	0.152756	0.594181	0.449847	0.414242
0.0164285	0.860226	0.032857	0.0492856	0.0657141	0.0821426	0.0985711	0.115	0.131428	0.147857	0.164285	0.180714	0.262856	0.377856	0.394284	0.574998	0.164285
0.114096	0.813266	0.228192	0.342288	0.456385	0.570481	0.684577	0.798673	0.912769	0.0268654	0.140962	0.255058	0.825539	0.624212	0.738308	0.993366	0.140962
0.614171	0.556836	0.228341	0.842512	0.456683	0.0708531	0.685024	0.299194	0.913365	0.527536	0.141706	0.755877	0.82673	0.125924	0.740095	0.495972	0.141706
0.365697	0.738997	0.731394	0.0970912	0.462788	0.828485	0.194182	0.55988	0.925577	0.291274	0.656971	0.0226678	0.851153	0.411033	0.77673	0.799398	0.656971
0.270706	0.316007	0.541411	0.812117	0.0828229	0.353529	0.624234	0.89494	0.165646	0.436352	0.707057	0.977763	0.331292	0.226232	0.496937	0.474701	0.707057
0.751186	0.135332	0.502372	0.253558	0.00474368	0.75593	0.507116	0.258301	0.00948736	0.760673	0.511859	0.263045	0.0189747	0.277276	0.0284621	0.291507	0.511859
0.181757	0.528548	0.363514	0.545271	0.727028	0.908785	0.090542	0.272299	0.454056	0.635813	0.81757	0.999327	0.908112	0.180411	0.362168	0.361495	0.81757
0.789842	0.310739	0.579685	0.369527	0.15937	0.949212	0.739055	0.528897	0.318739	0.108582	0.898424	0.688267	0.637479	0.166376	0.956218	0.644485	0.898424
0.881767	0.588119	0.763534	0.645301	0.527068	0.408835	0.290602	0.172369	0.0541355	0.935902	0.817669	0.699436	0.108271	0.28064	0.162406	0.861843	0.817669
0.856913	0.518084	0.713825	0.570738	0.427651	0.284564	0.141476	0.998389	0.855302	0.712214	0.569127	0.42604	0.710604	0.708993	0.565905	0.991945	0.569127
0.132084	0.430848	0.264168	0.396253	0.528337	0.660421	0.792505	0.924589	0.0566737	0.188758	0.320842	0.452926	0.113347	0.0379368	0.170021	0.622947	0.320842
0.939286	0.258843	0.878572	0.817858	0.757145	0.696431	0.635717	0.575003	0.514289	0.453575	0.392861	0.332148	0.0285784	0.603581	0.542868	0.875015	0.392861
0.582315	0.370226	0.164631	0.746946	0.329262	0.911577	0.493892	0.0762077	0.658523	0.240839	0.823154	0.405469	0.317046	0.393254	0.975569	0.381039	0.823154
0.97478	0.393018	0.94956	0.92434	0.89912	0.8739	0.848679	0.823459	0.798239	0.773019	0.747799	0.722579	0.596479	0.419938	0.394718	0.117297	0.747799
0.125962	0.446866	0.251924	0.377886	0.503847	0.629809	0.755771	0.881733	0.00769484	0.133657	0.259619	0.38558	0.0153897	0.897123	0.0230845	0.408665	0.259619
0.0409067	0.475896	0.0818134	0.12272	0.163627	0.204534	0.24544	0.286347	0.327254	0.36816	0.409067	0.449974	0.654507	0.940854	0.981761	0.431735	0.409067
0.518959	0.387831	0.0379186	0.556878	0.0758373	0.594797	0.113756	0.632715	0.151675	0.670634	0.189593	0.708552	0.303349	0.936064	0.455024	0.163576	0.189593
0.149212	0.279293	0.298423	0.447635	0.596847	0.746059	0.89527	0.0444822	0.193694	0.342906	0.492117	0.641329	0.387388	0.43187	0.581082	0.222411	0.492117
0.801678	0.0782632	0.603357	0.405035	0.206713	0.00839127	0.81007	0.611748	0.413426	0.215104	0.0167825	0.818461	0.826852	0.4386	0.240278	0.0587389	0.0167825
0.80641	0.369742	0.61282	0.41923	0.22564	0.0320506	0.838461	0.644871	0.451281	0.257691	0.0641012	0.870511	0.902562	0.547433	0.353843	0.224354	0.0641012
0.334914	0.253922	0.669829	0.00474328	0.339658	0.674572	0.00948655	0.344401	0.679315	0.0142298	0.349144	0.684059	0.358631	0.703032	0.0379462	0.722005	0.349144
0.90675	0.671784	0.8135	0.72025	0.627	0.533751	0.440501	0.347251	0.254001	0.160751	0.0675012	0.974251	0.508002	0.855253	0.762003	0.736254	0.0675012
0.749215	0.676237	0.49843	0.247645	0.99686	0.746075	0.49529	0.244505	0.993721	0.742936	0.492151	0.241366	0.987441	0.231947	0.981162	0.222527	0.492151
0.0576196	0.513936	0.115239	0.172859	0.230478	0.288098	0.345717	0.403337	0.460957	0.518576	0.576196	0.633815	0.921913	0.32525	0.38287	0.0166852	0.576196
0.412212	0.728608	0.824424	0.236637	0.648849	0.0610611	0.473273	0.885485	0.297698	0.70991	0.122122	0.534334	0.595395	0.480881	0.893093	0.427427	0.122122
0.0506364	0.720768	0.101273	0.151909	0.202546	0.253182	0.303818	0.354455	0.405091	0.455728	0.506364	0.557001	0.810183	0.164637	0.215274	0.772274	0.506364
0.0461631	0.944753	0.0923262	0.138489	0.184652	0.230815	0.276978	0.323142	0.369305	0.415468	0.461631	0.507794	0.738609	0.0617508	0.107914	0.615708	0.461631
0.862875	0.460697	0.725749	0.588624	0.451499	0.314373	0.177248	0.0401225	0.902997	0.765872	0.628746	0.491621	0.805994	0.846117	0.708991	0.200612	0.628746
0.334092	0.940163	0.668183	0.00227484	0.336366	0.670458	0.00454967	0.338641	0.672733	0.00682451	0.340916	0.675008	0.345466	0.684107	0.0181987	0.693206	0.340916
0.07772	0.32156	0.15544	0.23316	0.31088	0.3886	0.46632	0.54404	0.62176	0.69948	0.7772	0.85492	0.24352	0.78756	0.86528	0.7202	0.7772
0.23986	0.460434	0.479719	0.719579	0.959439	0.199298	0.439158	0.679017	0.918877	0.158737	0.398596	0.638456	0.837754	0.516772	0.756631	0.395087	0.398596
0.321013	0.517145	0.642025	0.963038	0.284051	0.605064	0.926076	0.247089	0.568102	0.889114	0.210127	0.53114	0.136203	0.383293	0.704305	0.235445	0.210127
0.260756	0.661355	0.521512	0.782269	0.043025	0.303781	0.564537	0.825294	0.08605	0.346806	0.607562	0.868319	0.1721	0.997394	0.25815	0.126469	0.607562
0.530241	0.401833	0.0604822	0.590723	0.120964	0.651205	0.181447	0.711688	0.241929	0.77217	0.302411	0.832652	0.483858	0.195545	0.725786	0.558438	0.302411
0.762064	0.60564	0.524129	0.286193	0.048257	0.810321	0.572386	0.33445	0.0965141	0.858578	0.620643	0.382707	0.193028	0.527478	0.289542	0.672249	0.620643
0.0139606	0.986503	0.0279212	0.0418818	0.0558423	0.0698029	0.0837635	0.0977241	0.111685	0.125645	0.139606	0.153566	0.223369	0.321093	0.335054	0.48862	0.139606
0.635544	0.150394	0.271089	0.906633	0.542177	0.177722	0.813266	0.44881	0.0843548	0.719899	0.355443	0.990988	0.16871	0.61752	0.253064	0.244052	0.355443
0.593831	0.670098	0.187662	0.781494	0.375325	0.969156	0.562987	0.156819	0.75065	0.344481	0.938312	0.532143	0.501299	0.658118	0.251949	0.784093	0.938312
0.521283	0.343818	0.042566	0.563849	0.0851321	0.606415	0.127698	0.648981	0.170264	0.691547	0.21283	0.734113	0.340528	0.989509	0.510792	0.244906	0.21283
0.203632	0.54171	0.407264	0.610895	0.814527	0.0181588	0.221791	0.425422	0.629054	0.832686	0.0363176	0.239949	0.258108	0.683531	0.887162	0.127112	0.0363176
0.439056	0.522808	0.878112	0.317168	0.756224	0.19528	0.634336	0.0733919	0.512448	0.951504	0.39056	0.829616	0.0248958	0.0982876	0.537344	0.366959	0.39056
0.213933	0.829239	0.427866	0.641798	0.855731	0.0696641	0.283597	0.49753	0.711462	0.925395	0.139328	0.353261	0.422925	0.920455	0.134387	0.487648	0.139328
0.568777	0.0149506	0.137553	0.70633	0.275106	0.843883	0.412659	0.981436	0.550212	0.118989	0.687766	0.256542	0.100425	0.0818607	0.650637	0.907179	0.687766
0.427531	0.27421	0.855062	0.282594	0.710125	0.137656	0.565187	0.992719	0.42025	0.847781	0.275312	0.702844	0.8405	0.833219	0.26075	0.963594	0.275312
0.517625	0.642979	0.0352503	0.552876	0.0705007	0.588126	0.105751	0.623376	0.141001	0.658627	0.176252	0.693877	0.282003	0.905379	0.423004	0.116881	0.176252
0.726304	0.546137	0.452608	0.178911	0.905215	0.631519	0.357823	0.0841266	0.81043	0.536734	0.263038	0.989342	0.620861	0.704987	0.431291	0.420633	0.263038
0.98791	0.917848	0.97582	0.963729	0.951639	0.939549	0.927459	0.915369	0.903279	0.891188	0.879098	0.867008	0.806557	0.721926	0.709836	0.576844	0.879098
0.800477	0.266613	0.600953	0.40143	0.201906	0.00238265	0.802859	0.603336	0.403812	0.204289	0.0047653	0.805242	0.807624	0.41096	0.211437	0.0166786	0.0047653
0.609048	0.970087	0.218095	0.827143	0.436191	0.0452384	0.654286	0.263334	0.872381	0.481429	0.0904767	0.699524	0.744763	0.00809652	0.617144	0.316669	0.0904767
0.264271	0.246733	0.528543	0.792814	0.0570853	0.321357	0.585628	0.849899	0.114171	0.378442	0.642713	0.906985	0.228341	0.0782406	0.342512	0.249497	0.642713
0.608263	0.843975	0.216525	0.824788	0.43305	0.0413126	0.649575	0.257838	0.8661	0.474363	0.0826252	0.690888	0.7322	0.990038	0.5983	0.289188	0.0826252
0.0681127	0.694024	0.136225	0.204338	0.272451	0.340564	0.408676	0.476789	0.544902	0.613015	0.681127	0.74924	0.0898036	0.566593	0.634705	0.383945	0.681127
0.770608	0.455752	0.541215	0.311823	0.08243	0.853038	0.623645	0.394253	0.16486	0.935468	0.706075	0.476683	0.32972	0.723973	0.49458	0.971263	0.706075
0.60028	0.817101	0.20056	0.80084	0.401119	0.00139924	0.601679	0.201959	0.802239	0.402519	0.00279849	0.603078	0.604478	0.806437	0.406716	0.00979471	0.00279849
0.903419	0.0220837	0.806839	0.710258	0.613678	0.517097	0.420516	0.323936	0.227355	0.130775	0.0341939	0.937613	0.45471	0.778646	0.682065	0.619679	0.0341939
0.769771	0.160749	0.539541	0.309312	0.0790825	0.848853	0.618624	0.388394	0.158165	0.927936	0.697706	0.467477	0.31633	0.704724	0.474495	0.941972	0.697706
0.534964	0.70695	0.0699276	0.604891	0.139855	0.674819	0.209783	0.744747	0.27971	0.814674	0.349638	0.884602	0.559421	0.304168	0.839131	0.723733	0.349638
0.136702	0.707826	0.273404	0.410106	0.546809	0.683511	0.820213	0.956915	0.0936171	0.230319	0.367021	0.503724	0.187234	0.144149	0.280851	0.784575	0.367021
0.552881	0.436638	0.105763	0.658644	0.211526	0.764407	0.317288	0.87017	0.423051	0.975932	0.528814	0.0816952	0.846102	0.716272	0.269153	0.350848	0.528814
0.277375	0.582421	0.55475	0.832125	0.1095	0.386875	0.66425	0.941625	0.219	0.496374	0.773749	0.0511244	0.437999	0.379624	0.656999	0.708123	0.773749
0.840642	0.75171	0.681284	0.521926	0.362568	0.203211	0.0438527	0.884495	0.725137	0.565779	0.406421	0.247063	0.450274	0.334769	0.175411	0.422474	0.406421
0.671988	0.991533	0.343976	0.0159644	0.687953	0.359941	0.0319288	0.703917	0.375905	0.0478931	0.719881	0.391869	0.75181	0.455727	0.127715	0.519584	0.719881
0.104453	0.695679	0.208906	0.313358	0.417811	0.522264	0.626717	0.731169	0.835622	0.940075	0.0445275	0.14898	0.671244	0.402413	0.506866	0.655846	0.0445275
0.537428	0.279512	0.0748558	0.612284	0.149712	0.687139	0.224567	0.761995	0.299423	0.836851	0.374279	0.911707	0.598846	0.360841	0.898269	0.809976	0.374279
0.550311	0.753863	0.100621	0.650932	0.201243	0.751554	0.301864	0.852175	0.402486	0.952797	0.503107	0.0534182	0.804972	0.657147	0.207458	0.260876	0.503107
0.0726548	0.171179	0.14531	0.217964	0.290619	0.363274	0.435929	0.508583	0.581238	0.653893	0.726548	0.799203	0.162476	0.67106	0.743715	0.542917	0.726548
0.108825	0.00425392	0.217651	0.326476	0.435302	0.544127	0.652953	0.761778	0.870603	0.979429	0.0882543	0.19708	0.741207	0.502985	0.61181	0.80889	0.0882543
0.0289214	0.495691	0.0578428	0.0867641	0.115686	0.144607	0.173528	0.20245	0.231371	0.260292	0.289214	0.318135	0.462742	0.665192	0.694113	0.0122482	0.289214
0.081582	0.0799169	0.163164	0.244746	0.326328	0.40791	0.489492	0.571074	0.652656	0.734238	0.81582	0.897402	0.305312	0.876386	0.957968	0.855371	0.81582
0.148949	0.163081	0.297898	0.446846	0.595795	0.744744	0.893693	0.0426415	0.19159	0.340539	0.489488	0.638437	0.383181	0.425822	0.574771	0.213208	0.489488
0.382268	0.903301	0.764537	0.146805	0.529074	0.911342	0.29361	0.675879	0.0581473	0.440416	0.822684	0.204952	0.116295	0.792173	0.174442	0.379394	0.822684
0.785126	0.782992	0.570252	0.355378	0.140503	0.925629	0.710755	0.495881	0.281007	0.0661328	0.851259	0.636384	0.562014	0.0578948	0.843021	0.479405	0.851259
0.610367	0.746679	0.220733	0.8311	0.441467	0.0518334	0.6622	0.272567	0.882934	0.4933	0.103667	0.714034	0.765867	0.0384339	0.648801	0.362834	0.103667
0.432955	0.436426	0.865911	0.298866	0.731821	0.164777	0.597732	0.0306872	0.463643	0.896598	0.329553	0.762509	0.927285	0.957972	0.390928	0.153436	0.329553
0.680059	0.00634169	0.360117	0.0401761	0.720235	0.400293	0.0803521	0.760411	0.44047	0.120528	0.800587	0.480646	0.880939	0.64135	0.321409	0.802054	0.800587
0.746365	0.584787	0.492731	0.239096	0.985462	0.731827	0.478193	0.224558	0.970924	0.717289	0.463655	0.21002	0.941847	0.166406	0.912771	0.122791	0.463655
0.164239	0.518478	0.328478	0.492717	0.656956	0.821195	0.985434	0.149673	0.313912	0.478151	0.64239	0.806629	0.627824	0.777497	0.941736	0.748364	0.64239
0.364586	0.0668498	0.729172	0.0937573	0.458343	0.822929	0.187515	0.5521	0.916686	0.281272	0.645858	0.0104435	0.833372	0.385473	0.750059	0.760502	0.645858
0.593122	0.544023	0.186245	0.779367	0.37249	0.965612	0.558735	0.151857	0.74498	0.338102	0.931224	0.524347	0.489959	0.641816	0.234939	0.759286	0.931224
0.609009	0.389731	0.218018	0.827027	0.436036	0.0450449	0.654054	0.263063	0.872072	0.481081	0.0900898	0.699099	0.744144	0.0072066	0.616216	0.315314	0.0900898
0.61397	0.215826	0.227941	0.841911	0.455882	0.0698524	0.683823	0.297793	0.911764	0.525734	0.139705	0.753675	0.823528	0.121321	0.735292	0.488967	0.139705
0.00190791	0.385769	0.00381583	0.00572374	0.00763165	0.00953956	0.0114475	0.0133554	0.0152633	0.0171712	0.0190791	0.020987	0.0305266	0.043882	0.0457899	0.0667769	0.0190791
0.0662862	0.626861	0.132572	0.198859	0.265145	0.331431	0.397717	0.464004	0.53029	0.596576	0.662862	0.729148	0.0605795	0.524583	0.590869	0.320018	0.662862
0.0724959	0.659053	0.144992	0.217488	0.289983	0.362479	0.434975	0.507471	0.579967	0.652463	0.724959	0.797454	0.159934	0.667405	0.7399	0.537355	0.724959
0.437756	0.70932	0.875512	0.313268	0.751024	0.18878	0.626536	0.0642922	0.502048	0.939804	0.37756	0.815316	0.00409655	0.0683888	0.506145	0.321461	0.37756
0.365668	0.538661	0.731336	0.0970046	0.462673	0.828341	0.194009	0.559677	0.925346	0.291014	0.656682	0.0223503	0.850691	0.410369	0.776037	0.798387	0.656682
0.785565	0.280289	0.57113	0.356694	0.142259	0.927824	0.713389	0.498953	0.284518	0.0700828	0.855648	0.641212	0.569036	0.0679893	0.853554	0.494766	0.855648
0.986775	0.815932	0.973549	0.960324	0.947098	0.933873	0.920647	0.907422	0.894196	0.880971	0.867745	0.85452	0.788392	0.695814	0.682588	0.537108	0.867745
0.719045	0.37191	0.43809	0.157134	0.876179	0.595224	0.314269	0.0333134	0.752358	0.471403	0.190448	0.909492	0.504716	0.53803	0.257075	0.166567	0.190448
0.985465	0.686102	0.97093	0.956394	0.941859	0.927324	0.912789	0.898253	0.883718	0.869183	0.854648	0.840112	0.767436	0.66569	0.651154	0.491267	0.854648
0.706254	0.310169	0.412508	0.118763	0.825017	0.531271	0.237525	0.94378	0.650034	0.356288	0.0625423	0.768797	0.300068	0.243847	0.950102	0.718898	0.0625423
0.0148706	0.00934752	0.0297412	0.0446118	0.0594825	0.0743531	0.0892237	0.104094	0.118965	0.133836	0.148706	0.163577	0.23793	0.342024	0.356895	0.520472	0.148706
0.930414	0.103797	0.860829	0.791243	0.721657	0.652072	0.582486	0.5129	0.443314	0.373729	0.304143	0.234557	0.886629	0.399529	0.329943	0.564501	0.304143
0.473217	0.52096	0.946434	0.419651	0.892868	0.366085	0.839301	0.312518	0.785735	0.258952	0.732169	0.205386	0.571471	0.883989	0.357206	0.562592	0.732169
0.35671	0.77588	0.713421	0.0701312	0.426842	0.783552	0.140262	0.496973	0.853683	0.210394	0.567104	0.923814	0.707366	0.204339	0.561049	0.484864	0.567104
0.231546	0.220685	0.463093	0.694639	0.926185	0.157732	0.389278	0.620824	0.852371	0.083917	0.315463	0.54701	0.704741	0.325566	0.557112	0.104122	0.315463
0.599182	0.0552788	0.198365	0.797547	0.39673	0.995912	0.595094	0.194277	0.793459	0.392642	0.991824	0.591007	0.586919	0.781196	0.380378	0.971384	0.991824
0.458835	0.0706349	0.91767	0.376505	0.83534	0.294175	0.75301	0.211845	0.67068	0.129515	0.58835	0.0471845	0.341359	0.553204	0.0120389	0.0592234	0.58835
0.639085	0.160274	0.278169	0.917254	0.556338	0.195423	0.834507	0.473592	0.112676	0.751761	0.390845	0.0299295	0.225352	0.698944	0.338028	0.367958	0.390845
0.0932244	0.723764	0.186449	0.279673	0.372897	0.466122	0.559346	0.652571	0.745795	0.839019	0.932244	0.025468	0.49159	0.14416	0.237385	0.262853	0.932244
0.821845	0.297022	0.64369	0.465535	0.28738	0.109226	0.931071	0.752916	0.574761	0.396606	0.218451	0.0402963	0.149522	0.902438	0.724283	0.764579	0.218451
0.750826	0.0506026	0.501651	0.252477	0.00330265	0.754128	0.504954	0.25578	0.00660529	0.757431	0.508257	0.259082	0.0132106	0.26899	0.0198159	0.278898	0.508257
0.126894	0.477804	0.253788	0.380683	0.507577	0.634471	0.761365	0.88826	0.015154	0.142048	0.268942	0.395837	0.0303079	0.918568	0.0454619	0.441299	0.268942
0.711583	0.457162	0.423167	0.13475	0.846333	0.557916	0.2695	0.981083	0.692666	0.404249	0.115833	0.827416	0.385332	0.366415	0.0779982	0.905414	0.115833
0.579856	0.519988	0.159712	0.739568	0.319424	0.89928	0.479136	0.0589925	0.638849	0.218705	0.798561	0.378417	0.277697	0.33669	0.916546	0.294963	0.798561
0.641	0.44649	0.282001	0.923001	0.564001	0.205001	0.846002	0.487002	0.128002	0.769002	0.410003	0.051003	0.256004	0.743006	0.384007	0.43501	0.410003
0.291628	0.150312	0.583255	0.874883	0.16651	0.458138	0.749765	0.0413926	0.33302	0.624648	0.916275	0.207903	0.66604	0.707433	0.99906	0.206963	0.916275
0.383743	0.285942	0.767485	0.151228	0.53497	0.918713	0.302456	0.686198	0.0699409	0.453683	0.837426	0.221169	0.139882	0.82608	0.209823	0.430991	0.837426
0.562026	0.833682	0.124051	0.686077	0.248103	0.810128	0.372154	0.93418	0.496205	0.058231	0.620257	0.182282	0.992411	0.92659	0.488616	0.670898	0.620257
0.965439	0.695637	0.930879	0.896318	0.861758	0.827197	0.792637	0.758076	0.723516	0.688955	0.654395	0.619834	0.447031	0.205107	0.170547	0.790381	0.654395
0.140883	0.577776	0.281766	0.422648	0.563531	0.704414	0.845297	0.986179	0.127062	0.267945	0.408828	0.54971	0.254124	0.240304	0.381186	0.930897	0.408828
0.816655	0.681164	0.63331	0.449965	0.26662	0.0832749	0.89993	0.716585	0.53324	0.349895	0.16655	0.983205	0.0664796	0.783064	0.599719	0.582924	0.16655
0.520211	0.331175	0.0404227	0.560634	0.0808455	0.601057	0.121268	0.64148	0.161691	0.681902	0.202114	0.722325	0.323382	0.964861	0.485073	0.207398	0.202114
0.192378	0.0574753	0.384755	0.577133	0.769511	0.961889	0.154266	0.346644	0.539022	0.7314	0.923777	0.116155	0.0780438	0.424688	0.617066	0.733221	0.923777
0.292624	0.986883	0.585248	0.877871	0.170495	0.463119	0.755743	0.0483664	0.34099	0.633614	0.926238	0.218861	0.68198	0.730347	0.0229704	0.241832	0.926238
0.127673	0.542393	0.255345	0.383018	0.510691	0.638363	0.766036	0.893709	0.0213813	0.149054	0.276727	0.404399	0.0427626	0.936471	0.0641439	0.468543	0.276727
0.794424	0.00165742	0.588848	0.383272	0.177695	0.972119	0.766543	0.560967	0.355391	0.149815	0.944239	0.738663	0.710782	0.271749	0.0661727	0.804835	0.944239
0.881877	0.856193	0.763753	0.64563	0.527506	0.409383	0.291259	0.173136	0.0550125	0.936889	0.818766	0.700642	0.110025	0.283161	0.165037	0.86568	0.818766
0.699373	0.0293555	0.398746	0.0981193	0.797492	0.496865	0.196239	0.895612	0.594985	0.294358	0.993731	0.693104	0.189969	0.0855811	0.784954	0.478058	0.993731
0.363556	0.37755	0.727111	0.0906665	0.454222	0.817778	0.181333	0.544889	0.908444	0.272	0.635555	0.999111	0.816888	0.361777	0.725332	0.724443	0.635555
0.277421	0.489652	0.554843	0.832264	0.109685	0.387107	0.664528	0.941949	0.219371	0.496792	0.774213	0.0516347	0.438741	0.380691	0.658112	0.709747	0.774213
0.620422	0.576173	0.240845	0.861267	0.48169	0.102112	0.722534	0.342957	0.963379	0.583802	0.204224	0.824647	0.926759	0.269716	0.890138	0.714784	0.204224
0.43951	0.738959	0.87902	0.318529	0.758039	0.197549	0.637059	0.0765684	0.516078	0.955588	0.395098	0.834607	0.0321563	0.108725	0.548235	0.382842	0.395098
0.84073	0.679332	0.681459	0.522189	0.362919	0.203648	0.0443779	0.885108	0.725837	0.566567	0.407297	0.248026	0.451674	0.336782	0.177512	0.425538	0.407297
0.143322	0.536267	0.286644	0.429966	0.573288	0.71661	0.859932	0.00325448	0.146577	0.289899	0.433221	0.576543	0.293153	0.296408	0.43973	0.0162724	0.433221
0.81401	0.0355877	0.628021	0.442031	0.256041	0.0700515	0.884062	0.698072	0.512082	0.326093	0.140103	0.954113	0.0241649	0.722237	0.536247	0.490361	0.140103
0.0711846	0.122507	0.142369	0.213554	0.284738	0.355923	0.427107	0.498292	0.569477	0.640661	0.711846	0.78303	0.138953	0.637245	0.70843	0.49146	0.711846
0.399162	0.973356	0.798324	0.197486	0.596648	0.99581	0.394972	0.794134	0.193296	0.592458	0.99162	0.390782	0.386591	0.180725	0.579887	0.970668	0.99162
0.714987	0.188276	0.429973	0.14496	0.859946	0.574933	0.289919	0.00490586	0.719892	0.434879	0.149866	0.864852	0.439785	0.444691	0.159677	0.0245293	0.149866
0.778978	0.351319	0.557955	0.336933	0.11591	0.894888	0.673865	0.452843	0.23182	0.0107979	0.789775	0.568753	0.463641	0.916484	0.695461	0.264214	0.789775
0.275636	0.614126	0.551272	0.826908	0.102543	0.378179	0.653815	0.929451	0.205087	0.480723	0.756359	0.0319944	0.410174	0.339625	0.61526	0.647255	0.756359
0.611759	0.607611	0.223518	0.835277	0.447036	0.0587955	0.670555	0.282314	0.894073	0.505832	0.117591	0.72935	0.788146	0.0704595	0.682219	0.411569	0.117591
0.835357	0.125933	0.670714	0.506071	0.341427	0.176784	0.0121411	0.847498	0.682855	0.518212	0.353569	0.188925	0.36571	0.213208	0.0485645	0.23749	0.353569
0.842627	0.552862	0.685253	0.52788	0.370506	0.213133	0.0557596	0.898386	0.741013	0.583639	0.426266	0.268893	0.482026	0.380412	0.223038	0.491931	0.426266
0.0251877	0.954028	0.0503754	0.0755632	0.100751	0.125939	0.151126	0.176314	0.201502	0.22669	0.251877	0.277065	0.403004	0.579318	0.604505	0.88157	0.251877
0.330066	0.356925	0.660133	0.990199	0.320265	0.650332	0.980398	0.310464	0.640531	0.970597	0.300663	0.63073	0.281062	0.591526	0.921592	0.552322	0.300663
0.425128	0.838102	0.850257	0.275385	0.700514	0.125642	0.55077	0.975899	0.401027	0.826156	0.251284	0.676412	0.802054	0.777953	0.203082	0.879494	0.251284
0.133122	0.974252	0.266243	0.399365	0.532486	0.665608	0.798729	0.931851	0.0649722	0.198094	0.331215	0.464337	0.129944	0.0617949	0.194916	0.659253	0.331215
0.373369	0.259014	0.746738	0.120107	0.493476	0.866845	0.240214	0.613582	0.986951	0.36032	0.733689	0.107058	0.973903	0.587485	0.960854	0.0679123	0.733689
0.211485	0.251528	0.422971	0.634456	0.845942	0.0574271	0.268912	0.480398	0.691883	0.903369	0.114854	0.32634	0.383767	0.864165	0.0756499	0.401989	0.114854
0.435344	0.424336	0.870688	0.306032	0.741377	0.176721	0.612065	0.047409	0.482753	0.918097	0.353441	0.788786	0.965506	0.0129153	0.448259	0.237045	0.353441
0.829036	0.813048	0.658071	0.487107	0.316142	0.145178	0.974214	0.803249	0.632285	0.46132	0.290356	0.119391	0.264569	0.0678185	0.896854	0.0162455	0.290356
0.601104	0.897914	0.202208	0.803312	0.404416	0.00551975	0.606624	0.207728	0.808832	0.409936	0.0110395	0.612143	0.617663	0.825391	0.426495	0.0386383	0.0110395
0.754097	0.244586	0.508195	0.262292	0.016389	0.770486	0.524584	0.278681	0.0327781	0.786875	0.540973	0.29507	0.0655562	0.344237	0.0983342	0.393404	0.540973
0.112648	0.760617	0.225296	0.337944	0.450592	0.56324	0.675888	0.788536	0.901184	0.0138325	0.126481	0.239129	0.802369	0.590905	0.703553	0.942682	0.126481
0.275892	0.694856	0.551784	0.827676	0.103567	0.379459	0.655351	0.931243	0.207135	0.483027	0.758919	0.0348104	0.41427	0.345513	0.621405	0.656215	0.758919
0.914423	0.451851	0.828846	0.743269	0.657692	0.572115	0.486538	0.400961	0.315384	0.229807	0.14423	0.0586531	0.630768	0.0317291	0.946152	0.0048052	0.14423
0.707455	0.26362	0.414911	0.122366	0.829822	0.537277	0.244732	0.952188	0.659643	0.367098	0.0745538	0.782009	0.319286	0.271474	0.978929	0.760938	0.0745538
0.202583	0.665503	0.405166	0.607749	0.810333	0.0129157	0.215499	0.418082	0.620665	0.823248	0.0258315	0.228415	0.24133	0.659412	0.861996	0.0904102	0.0258315
0.814965	0.116571	0.629929	0.444894	0.259858	0.0748231	0.889788	0.704752	0.519717	0.334682	0.149646	0.964611	0.0394339	0.744186	0.559151	0.523762	0.149646
0.110342	0.209562	0.220685	0.331027	0.441369	0.551711	0.662054	0.772396	0.882738	0.99308	0.103423	0.213765	0.765476	0.537872	0.648214	0.861979	0.103423
0.5222	0.113676	0.0444001	0.5666	0.0888003	0.611	0.1332	0.6554	0.177601	0.699801	0.222001	0.744201	0.355201	0.0106016	0.532802	0.277002	0.222001
0.616555	0.546975	0.233109	0.849664	0.466219	0.0827734	0.699328	0.315883	0.932437	0.548992	0.165547	0.782101	0.864875	0.180758	0.797312	0.579414	0.165547
0.434438	0.00607937	0.868876	0.303314	0.737752	0.17219	0.606628	0.0410662	0.475504	0.909942	0.34438	0.778818	0.951009	0.992075	0.426513	0.205331	0.34438
0.60004	0.175974	0.20008	0.800121	0.400161	0.000200893	0.600241	0.200281	0.800321	0.400362	0.000401786	0.600442	0.600643	0.800924	0.400964	0.00140625	0.000401786
0.875281	0.599359	0.750562	0.625843	0.501124	0.376405	0.251686	0.126967	0.00224843	0.877529	0.752811	0.628092	0.00449686	0.131464	0.00674528	0.634837	0.752811
0.848667	0.431908	0.697334	0.546	0.394667	0.243334	0.0920008	0.940668	0.789334	0.638001	0.486668	0.335335	0.578669	0.519336	0.368003	0.703338	0.486668
0.542894	0.0825065	0.0857878	0.628682	0.171576	0.714469	0.257363	0.800257	0.343151	0.886045	0.428939	0.971833	0.686302	0.486559	0.0294534	0.00128614	0.428939
0.417603	0.687414	0.835205	0.252808	0.670411	0.0880136	0.505616	0.923219	0.340822	0.758425	0.176027	0.59363	0.681644	0.604863	0.0224654	0.616095	0.176027
0.648992	0.37531	0.297984	0.946977	0.595969	0.244961	0.893953	0.542945	0.191937	0.84093	0.489922	0.138914	0.383875	0.92682	0.575812	0.714727	0.489922
0.611682	0.836207	0.223364	0.835046	0.446728	0.0584105	0.670093	0.281775	0.893457	0.505139	0.116821	0.728503	0.786914	0.0686885	0.680371	0.408874	0.116821
0.541212	0.123637	0.0824238	0.623636	0.164848	0.70606	0.247271	0.788483	0.329695	0.870907	0.412119	0.953331	0.659391	0.447874	0.989086	0.942417	0.412119
0.148593	0.973346	0.297185	0.445778	0.59437	0.742963	0.891556	0.0401482	0.188741	0.337333	0.485926	0.634519	0.377482	0.41763	0.566223	0.200741	0.485926
0.395926	0.0296353	0.791851	0.187777	0.583702	0.979628	0.375553	0.771479	0.167404	0.56333	0.959255	0.355181	0.334808	0.106287	0.502212	0.857393	0.959255
0.320202	0.0803531	0.640404	0.960606	0.280808	0.601009	0.921211	0.241413	0.561615	0.881817	0.202019	0.522221	0.12323	0.364643	0.684845	0.207066	0.202019
0.633052	0.494245	0.266103	0.899155	0.532207	0.165258	0.79831	0.431361	0.0644131	0.697465	0.330516	0.963568	0.128826	0.560188	0.193239	0.156807	0.330516
0.698948	0.769437	0.397896	0.0968436	0.795791	0.494739	0.193687	0.892635	0.591583	0.290531	0.989479	0.688427	0.183166	0.0758009	0.774749	0.463175	0.989479
0.216766	0.93403	0.433531	0.650297	0.867062	0.0838277	0.300593	0.517359	0.734124	0.95089	0.167655	0.384421	0.468249	0.985608	0.202373	0.586794	0.167655
0.178498	0.250155	0.356996	0.535495	0.713993	0.892491	0.0709893	0.249488	0.427986	0.606484	0.784982	0.96348	0.855972	0.105459	0.283957	0.247438	0.784982
0.0195642	0.359658	0.0391284	0.0586927	0.0782569	0.0978211	0.117385	0.13695	0.156514	0.176078	0.195642	0.215206	0.313028	0.449977	0.469541	0.684748	0.195642
0.815841	0.769114	0.631683	0.447524	0.263366	0.0792075	0.895049	0.71089	0.526732	0.342573	0.158415	0.974256	0.053464	0.764354	0.580196	0.554452	0.158415
0.848076	0.499955	0.696153	0.544229	0.392306	0.240382	0.0884588	0.936535	0.784612	0.632688	0.480765	0.328841	0.569223	0.505759	0.353835	0.682676	0.480765
0.621061	0.749252	0.242122	0.863184	0.484245	0.105306	0.726367	0.347429	0.96849	0.589551	0.210612	0.831673	0.93698	0.284408	0.905469	0.737143	0.210612
0.175911	0.671903	0.351822	0.527733	0.703644	0.879555	0.0554657	0.231377	0.407288	0.583199	0.75911	0.93502	0.814575	0.045952	0.221863	0.156883	0.75911
0.535411	0.681666	0.0708227	0.606234	0.141645	0.677057	0.212468	0.74788	0.283291	0.818702	0.354114	0.889525	0.566582	0.314461	0.849873	0.739398	0.354114
0.658837	0.75677	0.317674	0.976511	0.635348	0.294185	0.953022	0.611859	0.270696	0.929533	0.588369	0.247206	0.541391	0.15325	0.812087	0.0592932	0.588369
0.0725861	0.0363676	0.145172	0.217758	0.290344	0.36293	0.435516	0.508102	0.580688	0.653275	0.725861	0.798447	0.161377	0.669479	0.742065	0.540512	0.725861
0.95388	0.230572	0.907761	0.861641	0.815521	0.769401	0.723282	0.677162	0.631042	0.584923	0.538803	0.492683	0.262085	0.939247	0.893127	0.38581	0.538803
0.865987	0.221667	0.731975	0.597962	0.463949	0.329937	0.195924	0.0619111	0.927898	0.793886	0.659873	0.52586	0.855797	0.917708	0.783695	0.309556	0.659873
0.64858	0.562602	0.297161	0.945741	0.594321	0.242902	0.891482	0.540063	0.188643	0.837223	0.485804	0.134384	0.377286	0.917349	0.565929	0.700313	0.485804
0.690331	0.652622	0.380661	0.0709921	0.761323	0.451654	0.141984	0.832315	0.522646	0.212976	0.903307	0.593638	0.0452914	0.877606	0.567937	0.161575	0.903307
0.388276	0.61661	0.776553	0.164829	0.553105	0.941381	0.329658	0.717934	0.10621	0.494486	0.882763	0.271039	0.21242	0.930354	0.31863	0.589669	0.882763
0.75904	0.371466	0.51808	0.277121	0.036161	0.795201	0.554241	0.313282	0.0723219	0.831362	0.590402	0.349443	0.144644	0.457926	0.216966	0.566408	0.590402
0.189307	0.224801	0.378615	0.567922	0.757229	0.946537	0.135844	0.325151	0.514458	0.703766	0.893073	0.0823803	0.0289168	0.354068	0.543375	0.625756	0.893073
0.687822	0.233691	0.375645	0.063467	0.751289	0.439112	0.126934	0.814756	0.502579	0.190401	0.878223	0.566046	0.00515752	0.819914	0.507736	0.0737821	0.878223
0.230153	0.653012	0.460306	0.690459	0.920612	0.150765	0.380918	0.611071	0.841224	0.0713768	0.30153	0.531683	0.682448	0.293518	0.523671	0.0553541	0.30153
